# Supplementary material for: Antigenic structure of the human coronavirus OC43 spike reveals exposed and occluded neutralizing epitopes
Source: PubMed Central journal article supplement (PMC9132891; doi:10.1038/s41467-022-30658-0), 2022-05-25
Supplement: 41467_2022_30658_MOESM1_ESM.pdf [file 41467_2022_30658_MOESM1_ESM.pdf]

# **Supplementary Information**

## **Antigenic structure of the Human Coronavirus OC43 Spike reveals Exposed and Occluded Neutralizing Epitopes**

Chunyan Wang, Emma L. Hesketh, Tatiana Shamorkina, Wentao Li, Peter J. Franken, Dubravka Drabek, Rien van Haperen, Sarah Townend, Frank J.M. van Kuppeveld, Frank Grosveld, Neil A. Ranson, Joost Snijder, Raoul J. de Groot, Daniel L. Hurdiss and Berend-Jan Bosch

## Supplementary Table 1 Cryo-EM data collection, refinement and validation statistics.

|                                                     | OC43-S + 46C12<br>(EMDB-13549)<br>(PDB 7PNM) | OC43-S + 43E6<br>(EMDB-13550)<br>(PDB 7PNQ) | OC43-S + 47C9<br>(EMDB-13563)<br>(PDB 7PO5) | OC43-S + 37F1<br>(EMDB-13564) |
|-----------------------------------------------------|----------------------------------------------|---------------------------------------------|---------------------------------------------|-------------------------------|
| <b>Data collection and processing</b>               |                                              |                                             |                                             |                               |
| Magnification                                       | 75,000x                                      | 75,000x                                     | 75,000x                                     | 75,000x                       |
| Voltage (kV)                                        | 300                                          | 300                                         | 300                                         | 300                           |
| Electron exposure (e <sup>-</sup> /Å <sup>2</sup> ) | 52                                           | 52                                          | 52                                          | 52                            |
| Defocus range (µm)                                  | 0.8-2.6                                      | 0.8-2.6                                     | 0.8-2.6                                     | 0.8-2.6                       |
| Pixel size (Å)                                      | 1.065                                        | 1.065                                       | 1.065                                       | 1.065                         |
| Symmetry imposed                                    | C3                                           | C3                                          | C3                                          | C3                            |
| Initial particle images (no.)                       | 482,414                                      | 349,851                                     | 144,035                                     | 635,273                       |
| Final particle images (no.)                         | 76,638                                       | 53,157                                      | 45,798                                      | 23,452                        |
| Map resolution (Å)                                  | 3.7                                          | 3.7                                         | 3.9                                         | 4.4                           |
| FSC threshold                                       | 0.143                                        | 0.143                                       | 0.143                                       | 0.143                         |
| Map resolution range (Å)                            | 3.5-9.5                                      | 3.5-10.1                                    | 3.7-7.6                                     | 3.9-14.5                      |
| <b>Refinement</b>                                   |                                              |                                             |                                             |                               |
| Initial model used (PDB code)                       | 6NZK                                         | 6NZK                                        | 6NZK                                        | -                             |
| Model resolution (Å)                                | 3.9                                          | 3.7                                         | 4                                           | -                             |
| FSC threshold                                       | 0.5                                          | 0.5                                         | 0.5                                         | -                             |
| Map sharpening <i>B</i> factor (Å <sup>2</sup> )    | -139                                         | -150                                        | -180                                        | -                             |
| Model composition                                   |                                              |                                             |                                             |                               |
| Non-hydrogen atoms                                  | 33,540                                       | 32,925                                      | 32,934                                      | -                             |
| Protein residues                                    | 4,224                                        | 4,218                                       | 4,218                                       | -                             |
| Ligands                                             | 48                                           | 15                                          | 15                                          | -                             |
| <i>B</i> factors (Å <sup>2</sup> )                  |                                              |                                             |                                             |                               |
| Protein                                             | 68                                           | 75.68                                       | 36.21                                       | -                             |
| Ligand (Glycans)                                    | 89.05                                        | 98.88                                       | 70.37                                       | -                             |
| R.m.s. deviations                                   |                                              |                                             |                                             |                               |
| Bond lengths (Å)                                    | 0.003                                        | 0.003                                       | 0.003                                       | -                             |
| Bond angles (°)                                     | 0.741                                        | 0.650                                       | 0.655                                       | -                             |
| Validation                                          |                                              |                                             |                                             |                               |
| MolProbity score                                    | 1.5                                          | 1.26                                        | 1.34                                        | -                             |
| Clashscore                                          | 4.49                                         | 2.92                                        | 3.57                                        | -                             |
| Poor rotamers (%)                                   | 0.14                                         | 0.03                                        | 0.03                                        | -                             |
| Ramachandran plot                                   |                                              |                                             |                                             |                               |
| Favored (%)                                         | 96                                           | 96.93                                       | 96.43                                       | -                             |
| Allowed (%)                                         | 4                                            | 3                                           | 3.57                                        | -                             |
| Disallowed (%)                                      | 0                                            | 0.07                                        | 0                                           | -                             |

# Supplementary Table 2 OC43 spike gene sequences used to calculate the phylogenetic tree shown in Fig. 7a.

| Genbank ID:        | igtko ID:         | strain:                              | Country of isolation: | Year of isolation: |
|--------------------|-------------------|--------------------------------------|-----------------------|--------------------|
| MZ450972.1         | QXL74866.1        | OC43/Seattle/USA/20959/2021          | USA                   | 2021               |
| MT118683.1         | QQY99297.1        | 2019_0522                            | USA                   | 2019               |
| MN306053.1         | QEG03794.1        | HCoV_OC43/Seattle/USA/SC9430/2018    | USA                   | 2018               |
| MT118692.1         | QQY99373.1        | 2019_1540                            | USA                   | 2019               |
| MT118673.1         | QQY99219.1        | 2018_9142                            | USA                   | 2018               |
| MW532119.1         | QRK03922.1        | OC43/China/10/2017                   | China                 | 2017               |
| <b>OK245434*</b>   | <b>OK245433</b>   | <b>NL/2019</b>                       | <b>Netherlands</b>    | <b>2019</b>        |
| MW532118.1         | QRK03912.1        | OC43/China/09/2017                   | China                 | 2017               |
| MT118667.1         | QQY99171.1        | 2017_1822                            | USA                   | 2017               |
| MG197723.1         | AOX83381.1        | HZ-459                               | China                 | 2016               |
| KY967358.1         | ARK08651.1        | HCoV_OC43/Seattle/USA/SC2770/2015    | USA                   | 2015               |
| KU745535.1         | ANZ78836.1        | 14007/2014                           | China                 | 2014               |
| KF923904.1         | AV41895.1         | 12689/2012                           | China                 | 2012               |
| KX538964.1         | AQN78656.1        | MY-U002/12                           | Malaysia              | 2012               |
| MG197710.1         | AOX83303.1        | BJ-124                               | China                 | 2015               |
| KU745545.1         | ANZ78846.1        | 4452A/2015                           | China                 | 2015               |
| KU745548.1         | ANZ78849.1        | SZ1401443/2014                       | China                 | 2014               |
| LC315647.1         | BBA20976.1        | Tokyo/SGH-61/2014                    | Japan                 | 2014               |
| MF374983.2         | AVR40342.1        | HCoV-OC43/USA/TX/0070/2016           | USA                   | 2016               |
| KX538966.1         | AQN78672.1        | MY-U236/12                           | Malaysia              | 2012               |
| KY684759.1         | ARA15421.1        | HCoV_OC43/Seattle/USA/SC2269/2016    | USA                   | 2016               |
| KY967356.1         | ARK08635.1        | HCoV_OC43/Seattle/USA/SC2924/2015    | USA                   | 2015               |
| KU745539.1         | ANZ78840.1        | 4086A/2014                           | China                 | 2014               |
| KX538978.1         | AQN78768.1        | MY-U1758/13                          | Malaysia              | 2013               |
| KF923902.1         | AV41873.1         | 12689/2012                           | China                 | 2012               |
| KF572831.1         | AIL49511.1        | 12689_12                             | China                 | 2012               |
| KF963242.1         | AIX10761.1        | HCoV-OC43/FRA_EPI/Caen/2011/1/13     | France                | 2011               |
| KF572829.1         | AIL49509.1        | 11930_11                             | China                 | 2011               |
| KF963244.1         | AIX10763.1        | HCoV-OC43/FRA_EPI/Caen/2013/15       | France                | 2013               |
| KF963243.1         | AIX10762.1        | HCoV-OC43/FRA_EPI/Caen/2012/14       | France                | 2012               |
| KX538974.1         | AQN78736.1        | MY-U845/12                           | Malaysia              | 2012               |
| KF923903.1         | AV41879.1         | 12691/2011                           | China                 | 2012               |
| KX538975.1         | AQN78744.1        | MY-U1024/12                          | Malaysia              | 2012               |
| KX344031.1         | AOL02453.1        | LRT1_238                             | Mexico                | 2011               |
| KF963240.1         | AIX10759.1        | HCoV-OC43/FRA_EPI/Caen/2009/11       | France                | 2009               |
| KF572840.1         | AIL49520.1        | 3098A_12                             | China                 | 2012               |
| KJ958219.1         | AIX09807.1        | LY342                                | China                 | 2011               |
| AIL49495.1         | AIL49518.1        | 2134A_10                             | China                 | 2010               |
| KF572821.1         | AIL49501.1        | 10198_10                             | China                 | 2010               |
| KF572867.1         | AIL49547.1        | 8375_09                              | China                 | 2009               |
| KF923893.1         | AV41819.1         | 2151A/2010                           | China                 | 2010               |
| KF572872.1         | AIL49552.1        | 978A_08                              | China                 | 2008               |
| KF572815.1         | AIL49495.1        | 1489A_09                             | China                 | 2009               |
| KY674920.1         | ARB07433.1        | N09-595B                             | China                 | 2016               |
| KF572868.1         | AIL49548.1        | 892A_08                              | China                 | 2008               |
| KF923916.1         | AV41957.1         | 5519/2007                            | China                 | 2007               |
| KF572862.1         | AIL49542.1        | 5625_07                              | China                 | 2007               |
| KF572820.1         | AIL49500.1        | 079A_07                              | China                 | 2007               |
| MN488635.1         | QHB49099.1        | 4310800120_seq2                      | Netherlands           | 2008               |
| KF572843.1         | AIL49523.1        | 4954_07                              | China                 | 2007               |
| KF923908.1         | AV41909.1         | 5414/2007                            | China                 | 2007               |
| KF572854.1         | AIL49534.1        | 5484_07                              | China                 | 2007               |
| KF572857.1         | AIL49537.1        | 5517_07                              | China                 | 2007               |
| KF572818.1         | AIL49496.1        | 3647_06                              | China                 | 2006               |
| KF923905.1         | AV41891.1         | 229/2005                             | China                 | 2005               |
| JN129834.1         | AEN19358.1        | HK04-01                              | Hong Kong             | 2004               |
| MN488634.1         | QHB49098.1        | 4310600253_seq2                      | Netherlands           | 2006               |
| JN129835.1         | AEN19366.1        | HK04-02                              | Hong Kong             | 2004               |
| MN488633.1         | QHB49097.1        | 4310600157_seq2                      | Netherlands           | 2006               |
| KF963235.1         | AIX10754.1        | HCoV-OC43/FRA_EPI/Caen/2004/06       | France                | 2004               |
| <b>AY903455.1*</b> | <b>AAX84792.1</b> | <b>34364 Belgium 2004</b>            | <b>Belgium</b>        | <b>2004</b>        |
| KU745542.1         | ANZ78843.1        | 4446A/2015                           | China                 | 2015               |
| KF923895.1         | AV41831.1         | 10285/2010                           | China                 | 2010               |
| KF963231.1         | AIX10750.1        | HCoV-OC43/FRA_EPI/Caen/2001/02       | France                | 2001               |
| KF530068.1         | AGT51491.1        | OC43/human/USA007-11/2000            | USA                   | 2000               |
| KF530081.1         | AGT51620.1        | OC43/human/USA991-5/1999             | USA                   | 1999               |
| KF530070.1         | AGT51511.1        | OC43/human/USA991-19/1999            | USA                   | 1999               |
| KF530069.1         | AGT51501.1        | OC43/human/USA982-4/1998             | USA                   | 1998               |
| KF530099.1         | AGT51800.1        | OC43/human/USA971-5/1997             | USA                   | 1997               |
| KF530063.1         | AGT51441.1        | OC43/human/USA9612-48/1996           | USA                   | 1996               |
| KF530098.1         | AGT51790.1        | OC43/human/USA965-6/1996             | USA                   | 1996               |
| KF530084.1         | AGT51650.1        | OC43/human/USA951-18/1995            | USA                   | 1995               |
| KF530071.1         | AGT51521.1        | OC43/human/USA925-1/1992             | USA                   | 1992               |
| KF530076.1         | AGT51570.1        | OC43/human/USA911-11/1991            | USA                   | 1991               |
| <b>KF530088.1*</b> | <b>AGT51690.1</b> | <b>OC43/human/USA901-54/1990</b>     | <b>USA</b>            | <b>1990</b>        |
| KF530079.1         | AGT51600.1        | OC43/human/USA913-29/1991            | USA                   | 1991               |
| <b>OK245433*</b>   | <b>OK245433</b>   | <b>NL/2004</b>                       | <b>Netherlands</b>    | <b>2004</b>        |
| MN310478.1         | QEG03803.1        | HCoV_OC43/Seattle/USA/SC9428/2018    | USA                   | 2018               |
| MN306043.1         | QEG03776.1        | HCoV_OC43/Seattle/USA/SC0841/2019    | USA                   | 2019               |
| MW532108.1         | QRK03812.1        | OC43/China/07/201                    | China                 | 2017               |
| MT501650.1         | QLC35792.1        | cyb-BetaCoV2019                      | China                 | 2019               |
| KU745540.1         | ANZ78841.1        | 4400A/2015                           | China                 | 2015               |
| MW532109.1         | QRK03822.1        | OC43/China/12/2018                   | China                 | 2018               |
| MG197719.1         | AOX83357.1        | YC-67                                | China                 | 2015               |
| KU745541.1         | ANZ78842.1        | 4436A/2015                           | China                 | 2015               |
| KF572813.1         | AIL49493.1        | 3184A_12                             | China                 | 2012               |
| MG197709.1         | AOX83297.1        | BJ-112                               | China                 | 2015               |
| MT118671.1         | QQY99202.1        | 2018_8596                            | USA                   | 2018               |
| KY967360.1         | ARK08670.1        | HCoV_OC43/Seattle/USA/SC2476/2015    | USA                   | 2015               |
| <b>MF91443.1*</b>  | <b>AAK06266.1</b> | <b>HCoV-OC43/UK/London/0652/2016</b> | <b>UK</b>             | <b>2016</b>        |
| KU131570.1         | AMK59877.1        | HCoV-OC43/UK/London/2011             | UK                    | 2011               |
| LC315649.1         | BBA20982.1        | Tokyo/SGH-65/2016                    | Japan                 | 2016               |
| KF963241.1         | AIX10760.1        | HCoV-OC43/FRA_EPI/Caen/2010/12       | France                | 2010               |
| KF572812.1         | AIL49492.1        | 3074A_12                             | China                 | 2012               |
| KF572811.1         | AIL49491.1        | 2941A_11                             | China                 | 2011               |
| KF572804.1         | AIL49484.1        | 1783A_10                             | China                 | 2010               |
| KF572814.1         | AIL49494.1        | 3194A_12                             | China                 | 2012               |
| KF963238.1         | AIX10757.1        | HCoV-OC43/FRA_EPI/Caen/2007/09       | France                | 2007               |
| KF963239.1         | AIX10758.1        | HCoV-OC43/FRA_EPI/Caen/2008/10       | France                | 2008               |
| KF572805.1         | AIL49485.1        | 1908A_10                             | China                 | 2010               |
| KF963237.1         | AIX10756.1        | HCoV-OC43/FRA_EPI/Caen/2006/08       | France                | 2006               |
| AY903454.1         | AAX84791.1        | 89996 Belgium 2003                   | Belgium               | 2003               |
| AY903459.1         | AAK06269.1        | 87309 Belgium 2003                   | Belgium               | 2003               |
| KF963234.1         | AIX10753.1        | HCoV-OC43/FRA_EPI/Caen/2003/05       | France                | 2003               |
| AY903457.1         | AAX84794.1        | 37767 Belgium 2003                   | Belgium               | 2003               |
| AY903456.1         | AAX84793.1        | 84020 Belgium 2003                   | Belgium               | 2003               |
| Z21849             | CAA79896.1        | HCV-OC43                             | ?                     | ?                  |
| <b>AY391777.1*</b> | <b>AAR01015.1</b> | <b>ATCC VR-799</b>                   | <b>USA</b>            | <b>1967</b>        |
| KF963236.1         | AIX10755.1        | HCoV-OC43/FRA_EPI/Caen/2005/07       | France                | 2005               |
| KF963233.1         | AIX10752.1        | HCoV-OC43/FRA_EPI/Caen/2002/04       | France                | 2002               |
| KF963230.1         | AIX10749.1        | HCoV-OC43/FRA_EPI/Caen/2001/01       | France                | 2001               |
| KF530092.1         | AGT51730.1        | OC43/human/USA008-5/2000             | USA                   | 2000               |
| KF530072.1         | AGT51531.1        | OC43/human/USA9712-13/1997           | USA                   | 1997               |
| KF530080.1         | AGT51610.1        | OC43/human/USA9712-31/1997           | USA                   | 1997               |
| KF530078.1         | AGT51590.1        | OC43/human/USA9612-29/1996           | USA                   | 1996               |
| KF530062.1         | AGT51431.1        | OC43/human/USA952-23/1995            | USA                   | 1995               |
| KF530074.1         | AGT51551.1        | OC43/human/USA9212-33/1992           | USA                   | 1992               |
| <b>KF530065.1*</b> | <b>AGT51481.1</b> | <b>OC43/human/USA901-41/1990</b>     | <b>USA</b>            | <b>1990</b>        |
| KF530073.1         | AGT51541.1        | OC43/human/USA8912-37/1989           | USA                   | 1989               |
| KF530085.1         | AGT51660.1        | OC43/human/USA871-25/1987            | USA                   | 1987               |
| KF530077.1         | AGT51580.1        | OC43/human/USA873-16/1987            | USA                   | 1987               |
| KF530060.1         | AGT51412.1        | OC43/human/USA851-15/1985            | USA                   | 1985               |
| KF530087.1         | AGT51680.1        | OC43/human/USA873-6/1987             | USA                   | 1987               |
| KF530093.1         | AGT51740.1        | OC43/human/USA832-27/1983            | USA                   | 1983               |

\* GenBank ID order corresponds to the positions of S types in the phylogenetic tree from top to bottom (Fig. 7a). S types used to assess antibody binding breadth (Fig. 7c) are highlighted in red.

# Supplementary Fig. 1

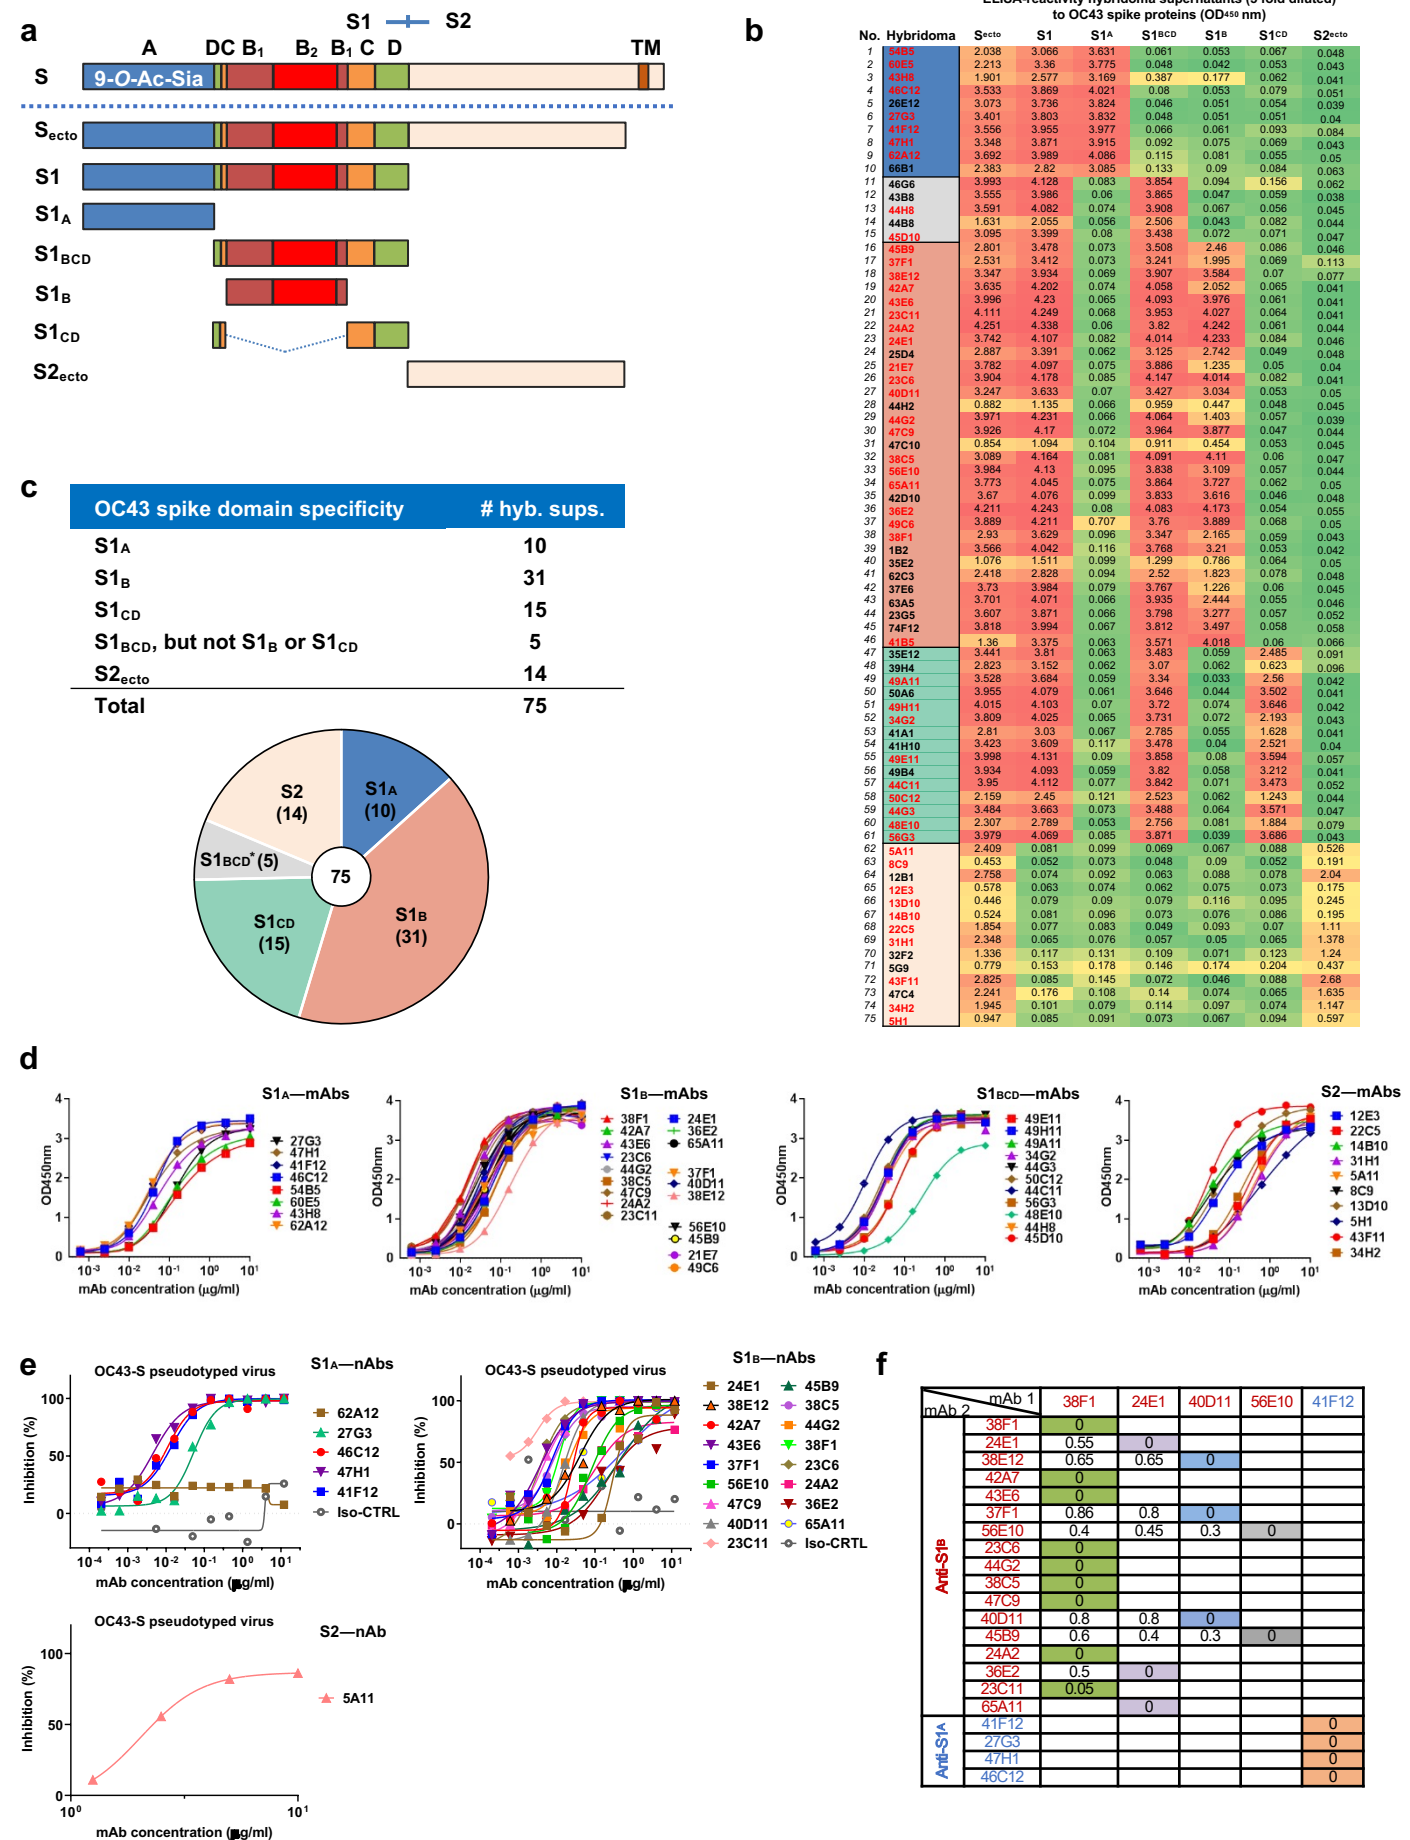

**Supplementary Fig. 1 Characterization of OC43 S-reactive H2L2 antibodies.** **a**, Upper part: Overall topology of OC43 spike (S) protein monomer. The S subunits (S1 and S2), S1 domains (A through D), transmembrane domain (TM) and 9-O-Ac-Sia receptor binding function are indicated. Lower part: recombinant soluble OC43 S antigens used for epitope mapping, including S ectodomain ( $S_{\text{ecto}}$ ), S1 and S1 variants ( $S1_A$ ,  $S1_{BCD}$ ,  $S1_B$  and  $S1_{CD}$ ) and the ectodomain of S2 subunit ( $S2_{\text{ecto}}$ ).  $S_{\text{ecto}}$  contains a mutation in the furin cleavage site at the S1/S2 junction,  $S_{\text{ecto}}$  and  $S2_{\text{ecto}}$  were C-terminally fused to a GCN4 trimerization motif and a Strep-tag (ST) for purification whereas all S1 domains were C-terminally fused to a human IgG1-Fc purification tag (not shown in figure). **b**, Heatmap showing the ELISA-reactivity of antibodies in H2L2 hybridoma supernatants to different types of OC43 S proteins, including OC43  $S_{\text{ecto}}$ , S1,  $S1_A$ ,  $S1_{BCD}$ ,  $S1_B$ ,  $S1_{CD}$  and  $S2_{\text{ecto}}$ . The ELISA OD<sub>450nm</sub> values of hybridoma supernatants (1:5 dilution) for the different antigens are shown and signal intensities are visualized range from red to green indicating high to low OD values, respectively. Antibodies of hybridomas that were successfully subcloned are colored in red. **c**, Pie chart viewing the number of in total 75 OC43 S-specific H2L2 hybridoma supernatants that bind to the indicated OC43 S domains as defined under **b**.  $S1_{BCD}^*$ : mAbs that are reactive to  $S1_{BCD}$  but not to the  $S1_B$  or  $S1_{CD}$ . **d**, ELISA binding curves of mAbs to  $S_{\text{ecto}}$  of OC43. Data from a representative experiment (out of two) are shown. **e**, Neutralizing activity of 22 neutralizing H2L2 mAbs against OC43 S pseudotyped VSV. Symbols represent means of triplicates. **f**, Epitope grouping of OC43 S mAbs using biolayer interferometry. Sensor captured OC43  $S_{\text{ecto}}$  was saturated in binding with a given anti-OC43 S mAb1 and then exposed to binding by mAb2. Additional binding of the second antibody indicates the presence of an unoccupied epitope, whereas lack of binding indicates epitope blocking by the first antibody. Binding signal (nm) of mAb2 is indicated in the box.

# Supplementary Fig. 2

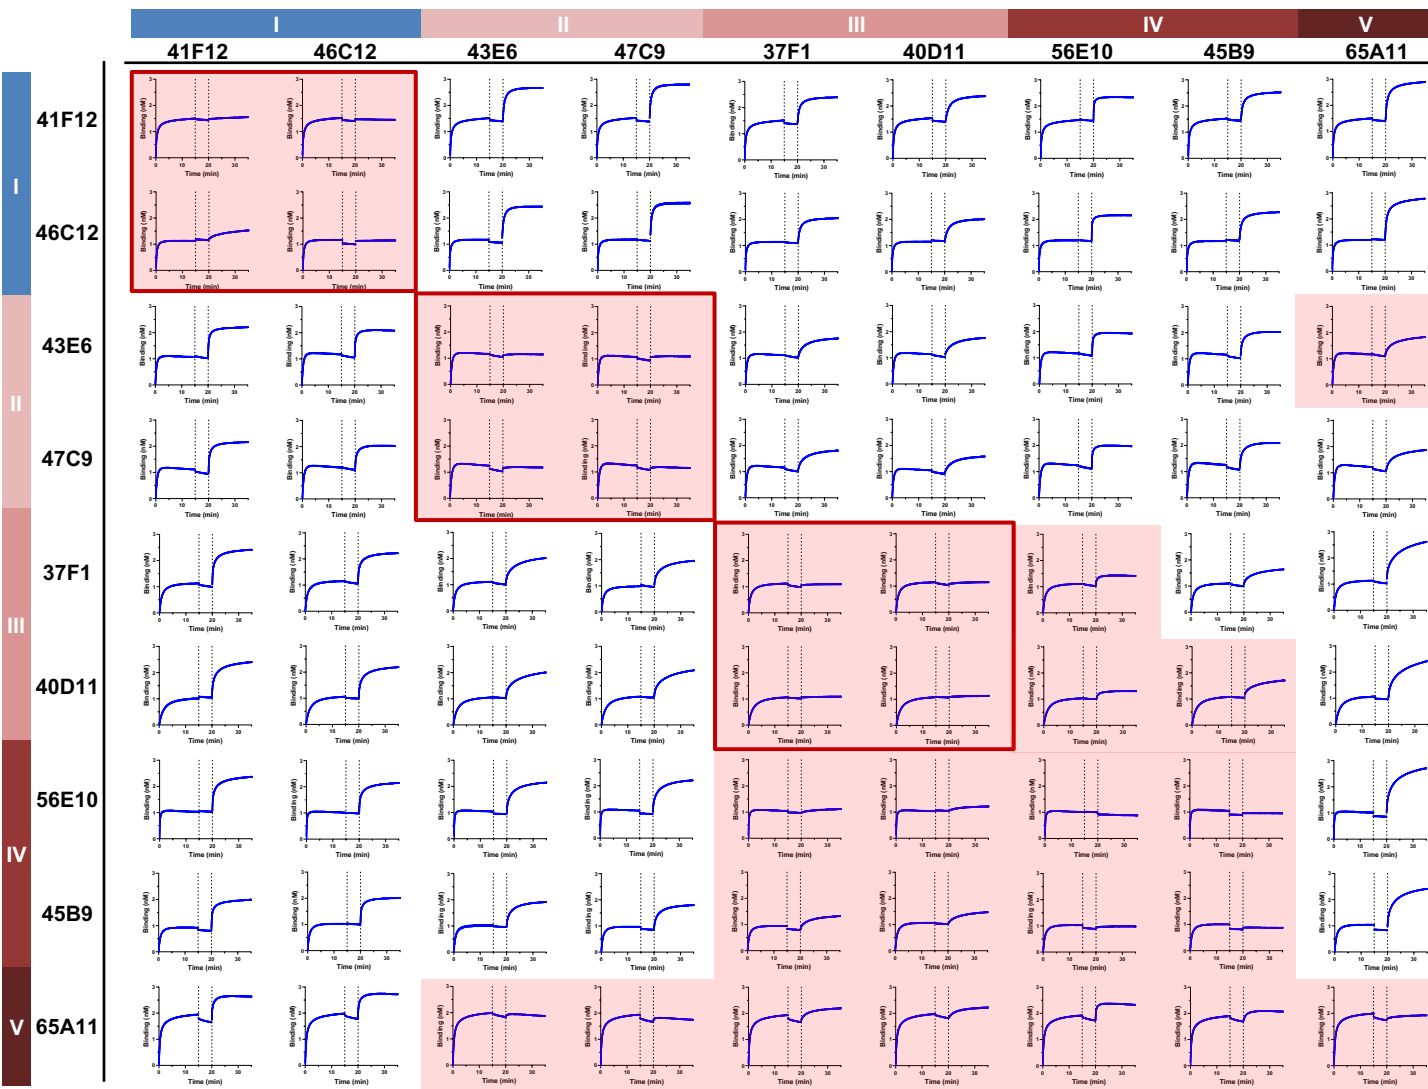

**Supplementary Fig. 2 Antibody binding competition analysed by biolayer interferometry.** Immobilized OC43 S1 antigen was saturated in binding with a given anti-OC43 S mAb (mAb 1) and then exposed to binding by a second mAb (mAb 2). Additional binding of the second antibody indicates the presence of an unoccupied epitope, whereas lack of binding indicates epitope blocking by mAb1. As a control, the first mAb was also included in the second step to check for self-competition. Colored boxes indicate competition, three mutually exclusive antibody groups (red rectangles, group I-III) were defined as well as two groups (IV and V) with a more miscellaneous binding competition profile. Numbers of antibody groups are indicated on the top and left. A representative experiment (out of two) is shown.

# Supplementary Fig. 3

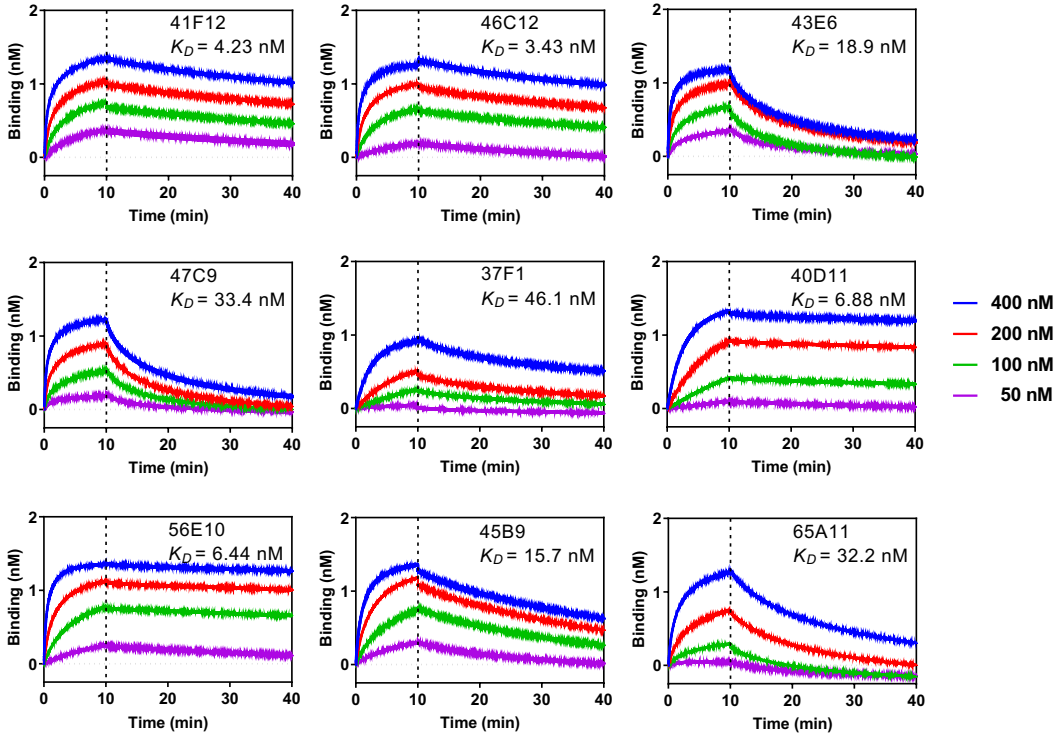

**Supplementary Fig. 3 Antibody binding kinetics to OC43 S1.** Binding kinetics of S1-directed human mAbs to recombinant OC43 S1 were measured using biolayer interferometry at 25°C. The binding assay was performed by loading each mAb at optimal concentration (44 nM) to an anti-human Fc biosensor for 10 min. Antigen association step was performed by incubating the sensor with a range of concentrations of monomeric S1 (400-200-100-50 nM) for 10 min, followed by a dissociation step in PBS for 60 min. The kinetics constants were calculated using 1:1 Langmuir binding model on Fortebio Data Analysis 7.0 software. A representative experiment (out of two) is shown.

# Supplementary Fig. 4

**a**

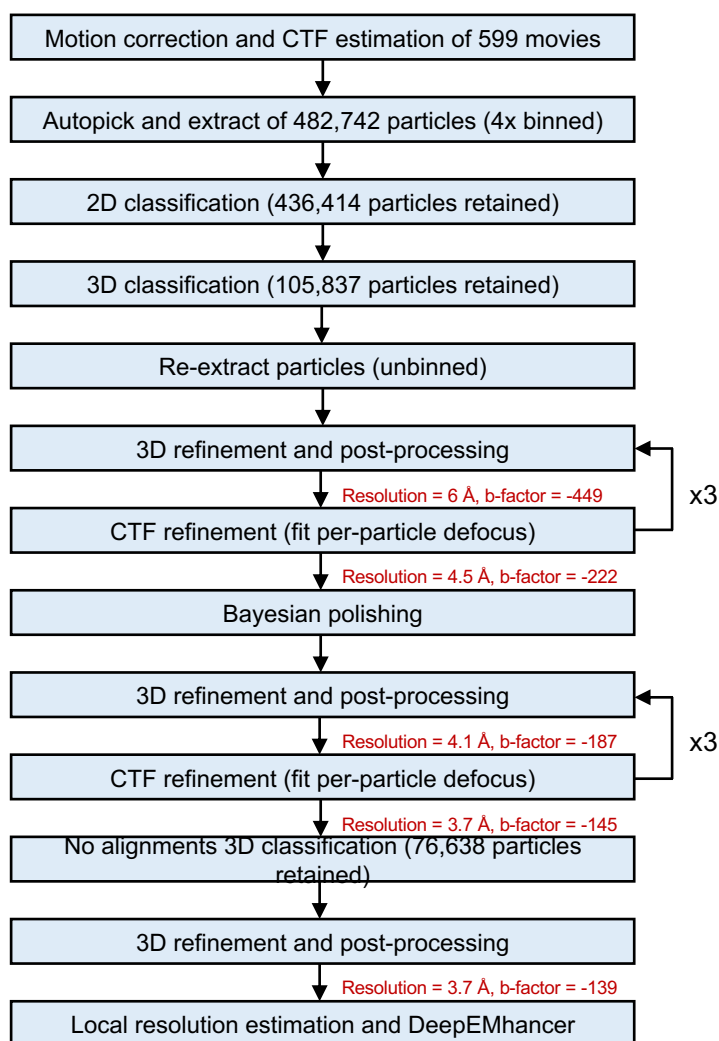

**b**

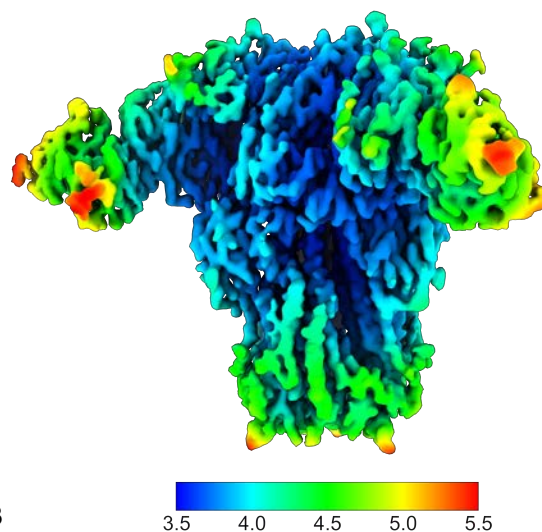

**c**

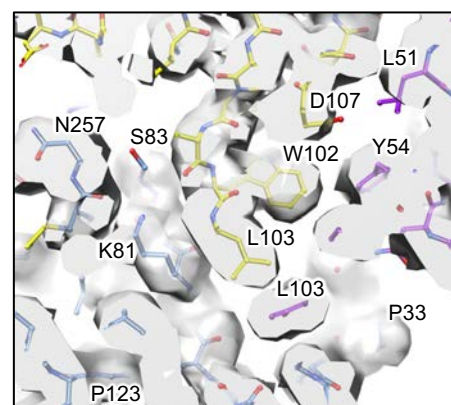

**d**

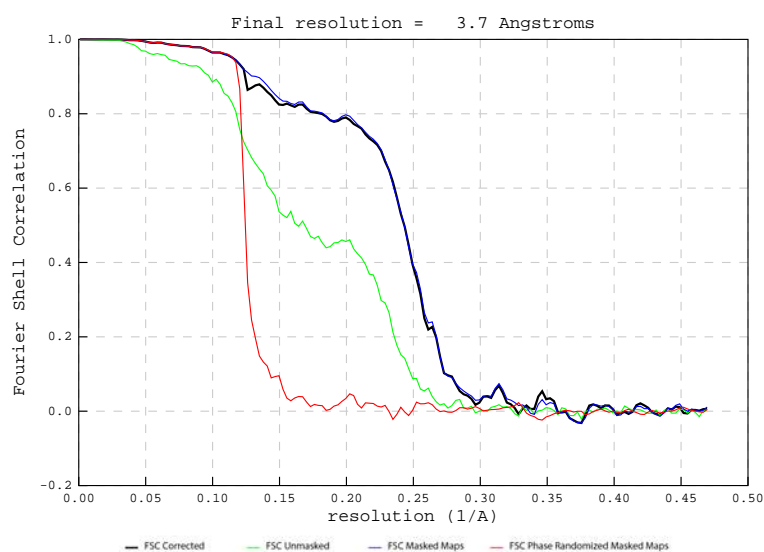

**e**

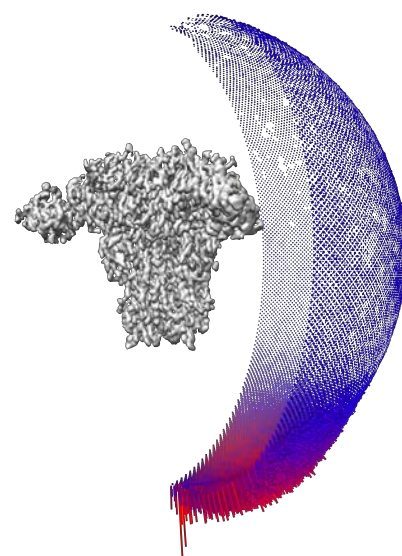

**Supplementary Fig. 4 Cryo-EM data processing of OC43-S bound to 46C12.** **a**, Single-particle cryo-EM image processing workflow for the OC43 spike:46C12 data set. **b**, EM density map for the C3 refined complex, colored according to local resolution which was calculated in Relion3.1.1. **c**, EM density for the 46C12 epitope/paratope region. The OC43-S protomer is colored blue and the heavy- and light-chain variable domains are colored yellow and purple, respectively. **d**, Gold-standard Fourier shell correlation (FSC) curve generated from the independent half maps contributing to the 3.7 Å resolution density map. **e**, Angular distribution plot of the final C3 refined OC43 spike:46C12 EM density map.



**Supplementary Fig. 5**

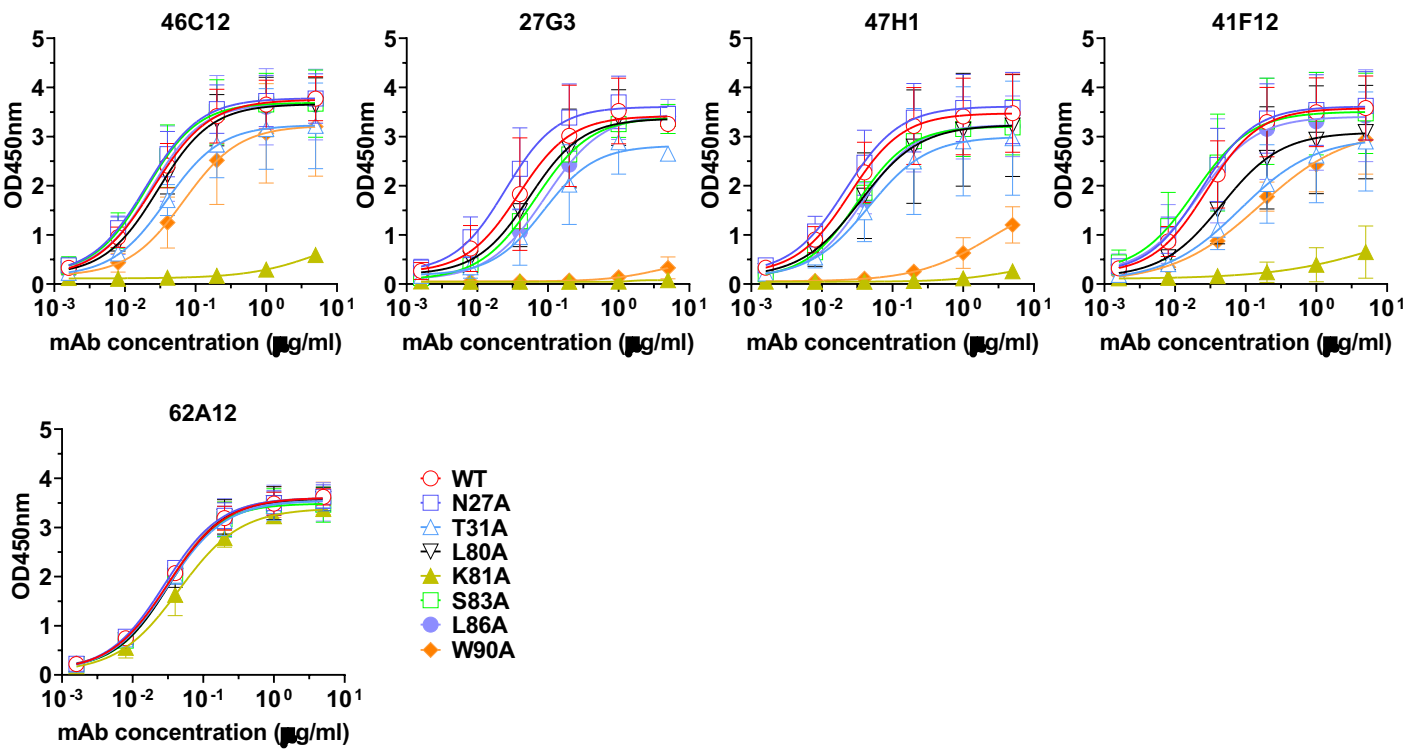

**Supplementary Fig. 5 Neutralizing S1<sub>A</sub> binding antibodies target the sialoglycan-receptor binding site.** Binding of S1<sub>A</sub>-reactive mAbs to OC43 S1<sub>A</sub> with single alanine substitution of 9-O-Sia-interacting residues was tested by ELISA. The average ± SD of two biological replicates with four technical replicates is shown.

# Supplementary Fig. 6

**a**

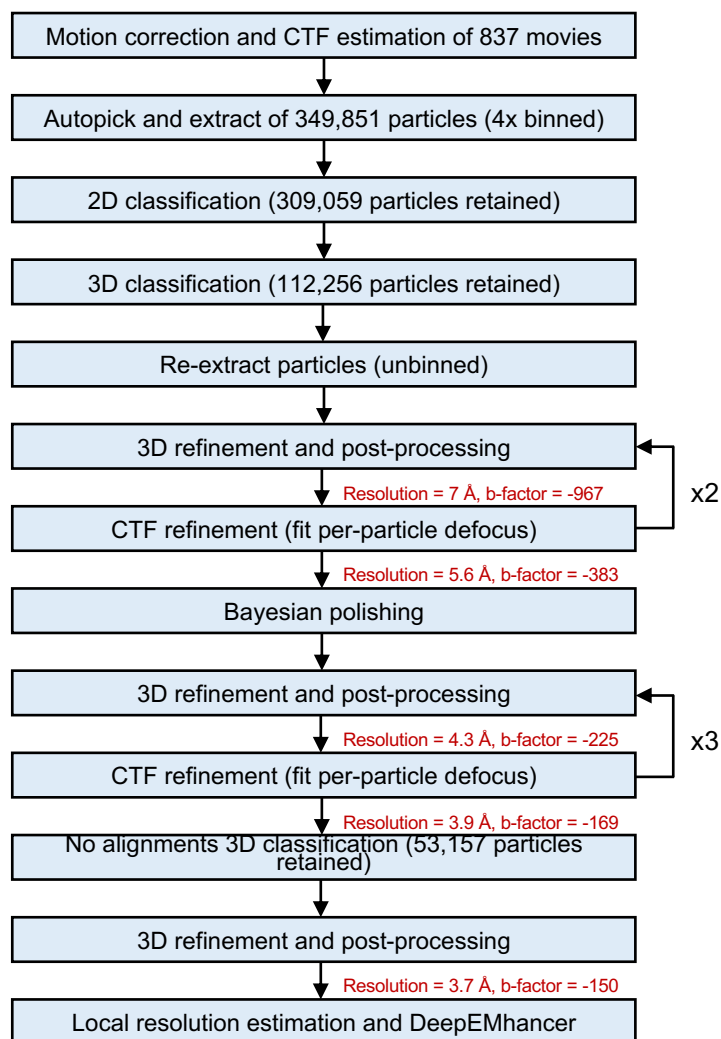

**b**

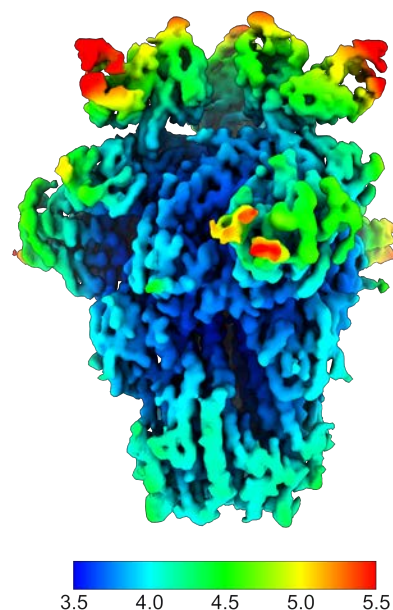

**c**

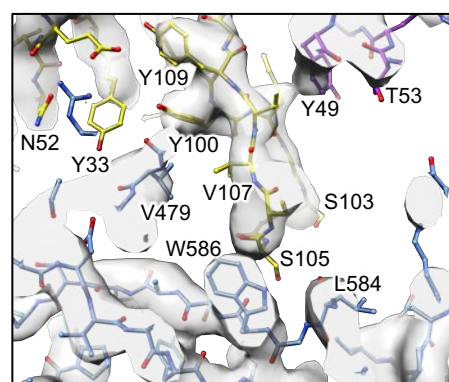

**d**

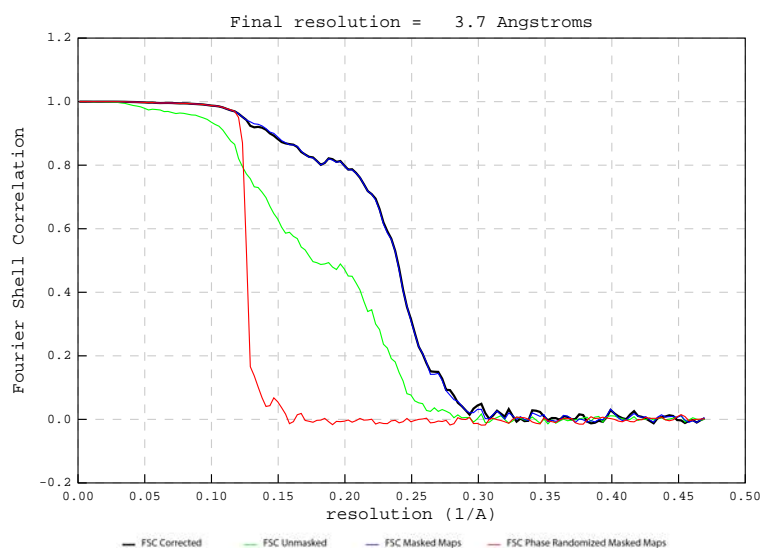

**e**

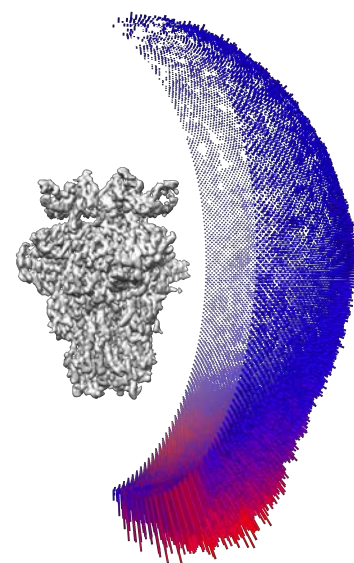

**Supplementary Fig. 6 Cryo-EM data processing of OC43-S bound to 43E6.** **a**, Single-particle cryo-EM image processing workflow for the OC43 spike:43E6 data set. **b**, EM density map for the C3 refined complex, colored according to local resolution which was calculated in Relion3.1.1. **c**, EM density for the 43E6 epitope/paratope region. The OC43-S protomer is colored blue and the heavy- and light-chain variable domains are colored yellow and purple, respectively. **d**, Gold-standard Fourier shell correlation (FSC) curve generated from the independent half maps contributing to the 3.7 Å resolution density map. **e**, Angular distribution plot of the final C3 refined OC43 spike:43E6 EM density map.

# Supplementary Fig. 7

**a**

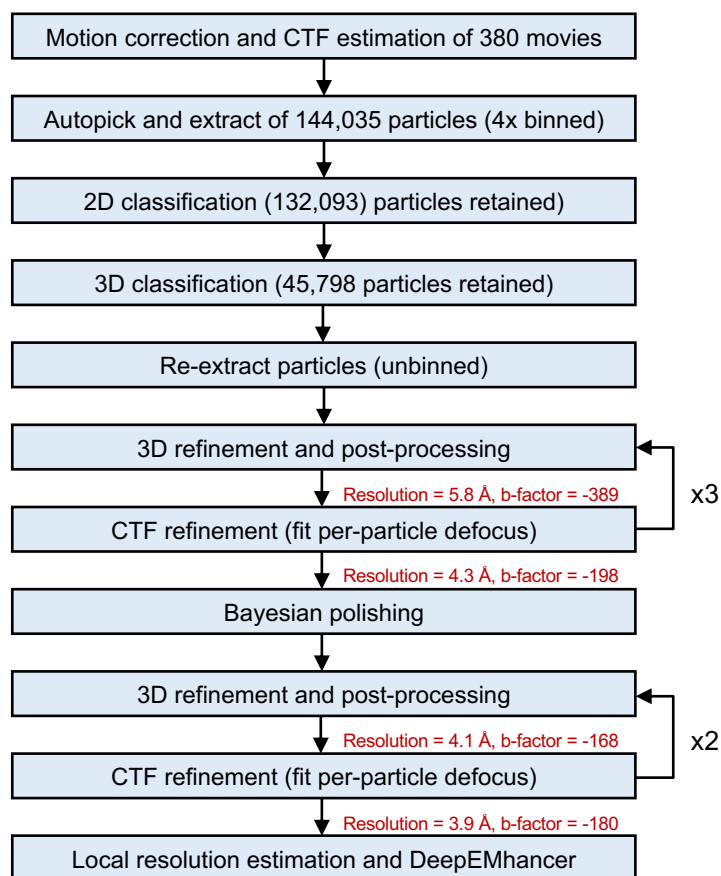

**b**

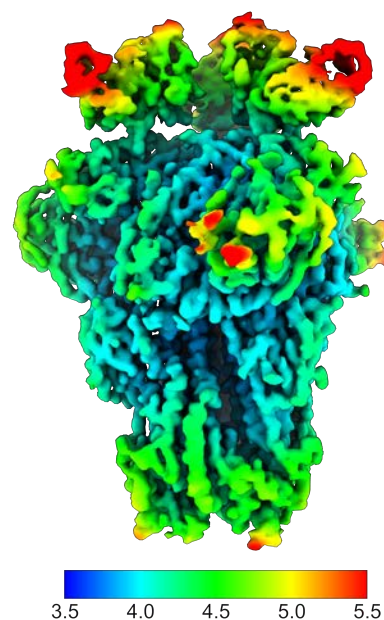

**c**

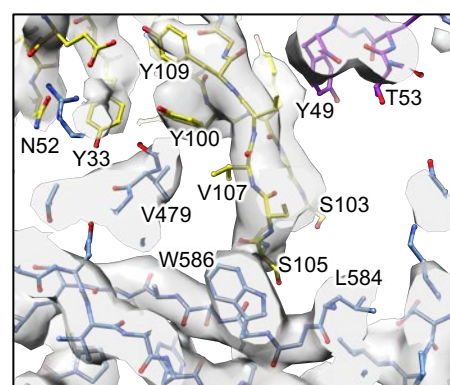

**d**

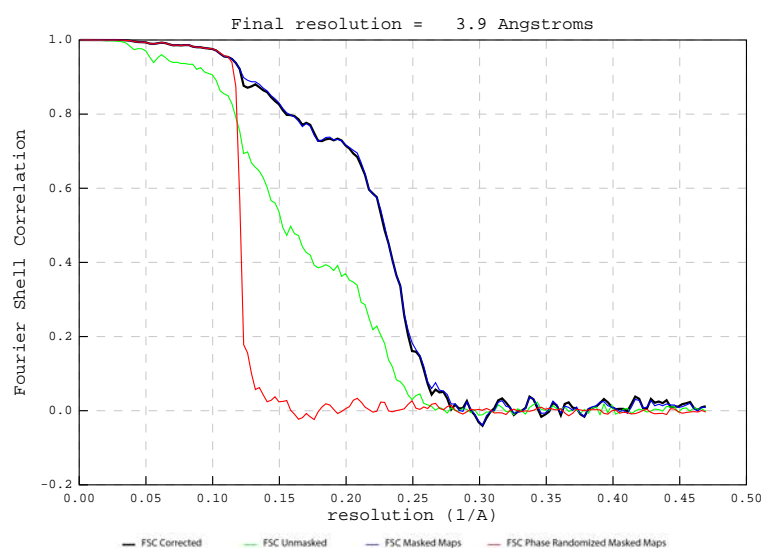

**e**

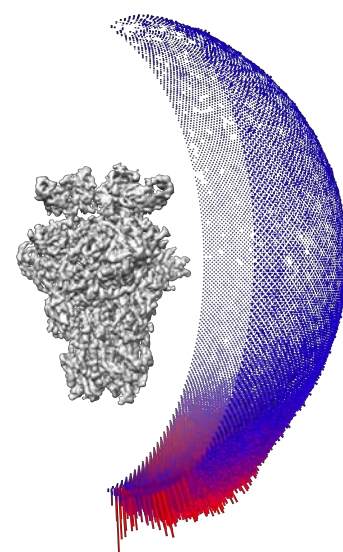

**Supplementary Fig. 7 Cryo-EM data processing of OC43-S bound to 47C9.** **a**, Single-particle cryo-EM image processing workflow for the OC43 spike:47C9 data set. **b**, EM density map for the C3 refined complex, colored according to local resolution which was calculated in Relion3.1.1. **c**, EM density for the 47C9 epitope/paratope region. The OC43-S protomer is colored blue and the heavy- and light-chain variable domains are colored yellow and purple, respectively. **d**, Gold-standard Fourier shell correlation (FSC) curve generated from the independent half maps contributing to the 3.9 Å resolution density map. **e**, Angular distribution plot of the final C3 refined OC43 spike:47C9 EM density map.

# Supplementary Fig. 8

**a**

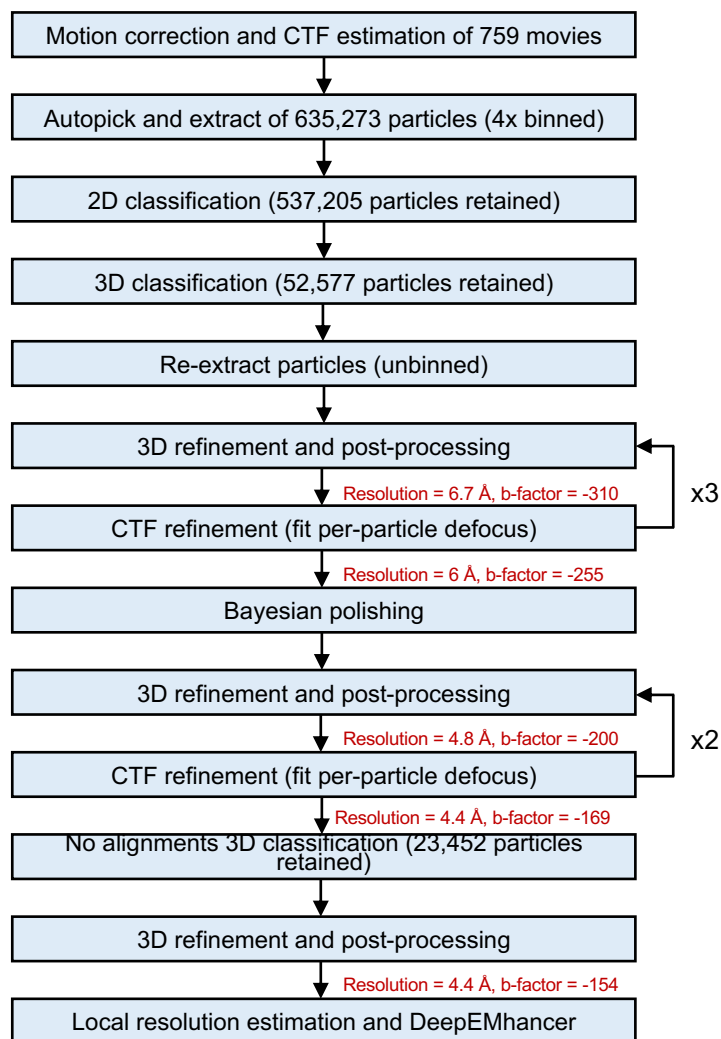

**b**

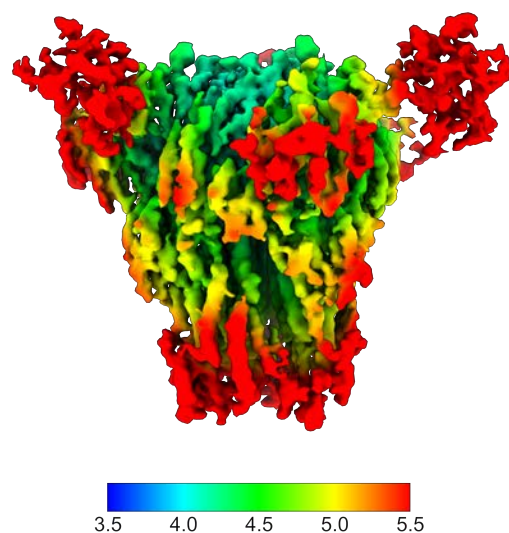

**c**

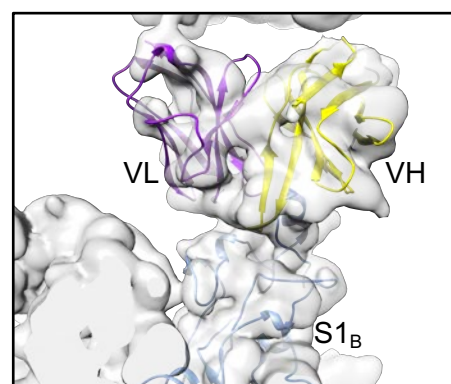

**d**

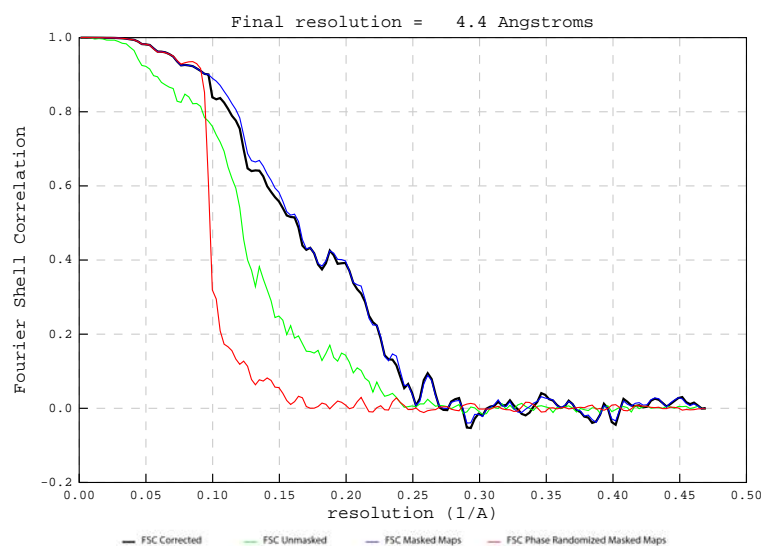

**e**

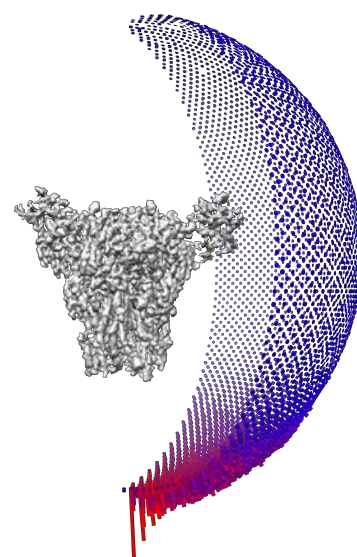

**Supplementary Fig. 8 Cryo-EM data processing of OC43-S bound to 37F1.** **a**, Single-particle cryo-EM image processing workflow for the OC43 spike:37F1 data set. **b**, EM density map for the C3 refined complex, colored according to local resolution which was calculated in Relion3.1.1. **c**, EM density for the 37F1 epitope/paratope region. The OC43-S protomer is colored blue and the heavy- and light-chain variable domains are colored yellow and purple, respectively. **d**, Gold-standard Fourier shell correlation (FSC) curve generated from the independent half maps contributing to the 4.4 Å resolution density map. **e**, Angular distribution plot of the final C3 refined OC43 spike:37F1 EM density map.

## Supplementary Fig. 9

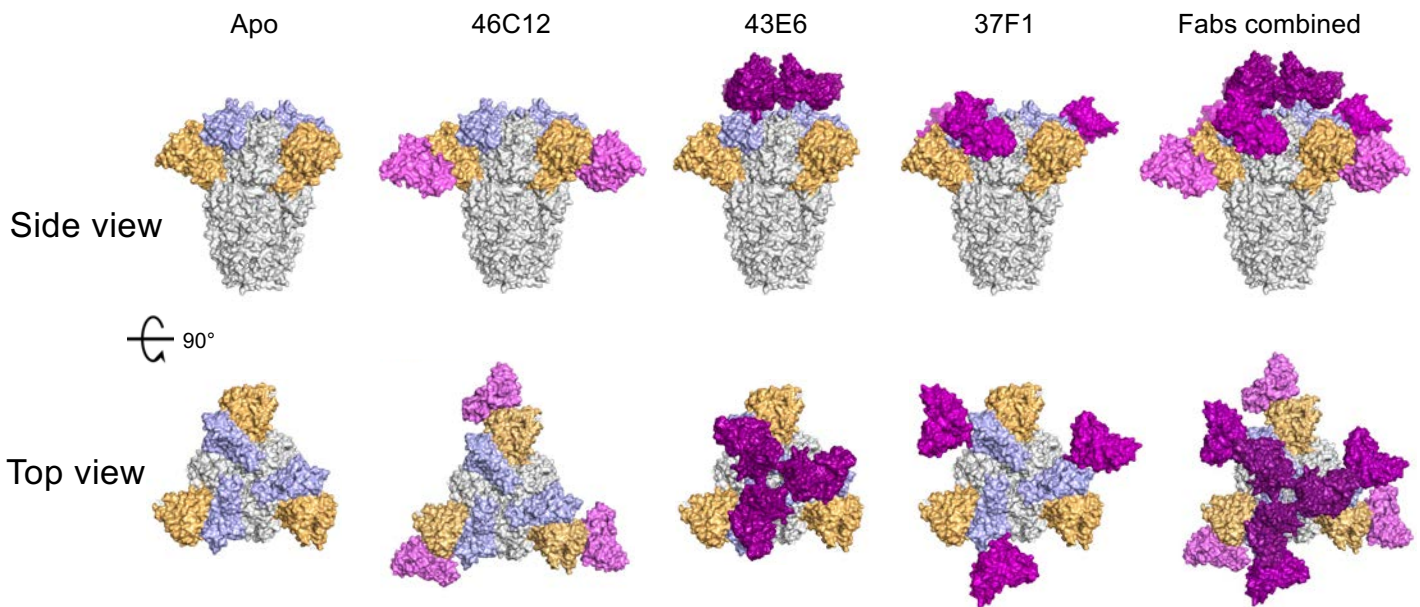

**Supplementary Fig. 9 Models of the OC43 S trimer with the bound Fab fragments of 46C12, 43E6 and 37F1, viewed along two orthogonal orientations.** Fabs are highlighted in magenta colors, S1<sub>A</sub> and the B2 subdomain of S1<sub>B</sub> are indicated in light orange and light blue, respectively.

# Supplementary Fig. 10

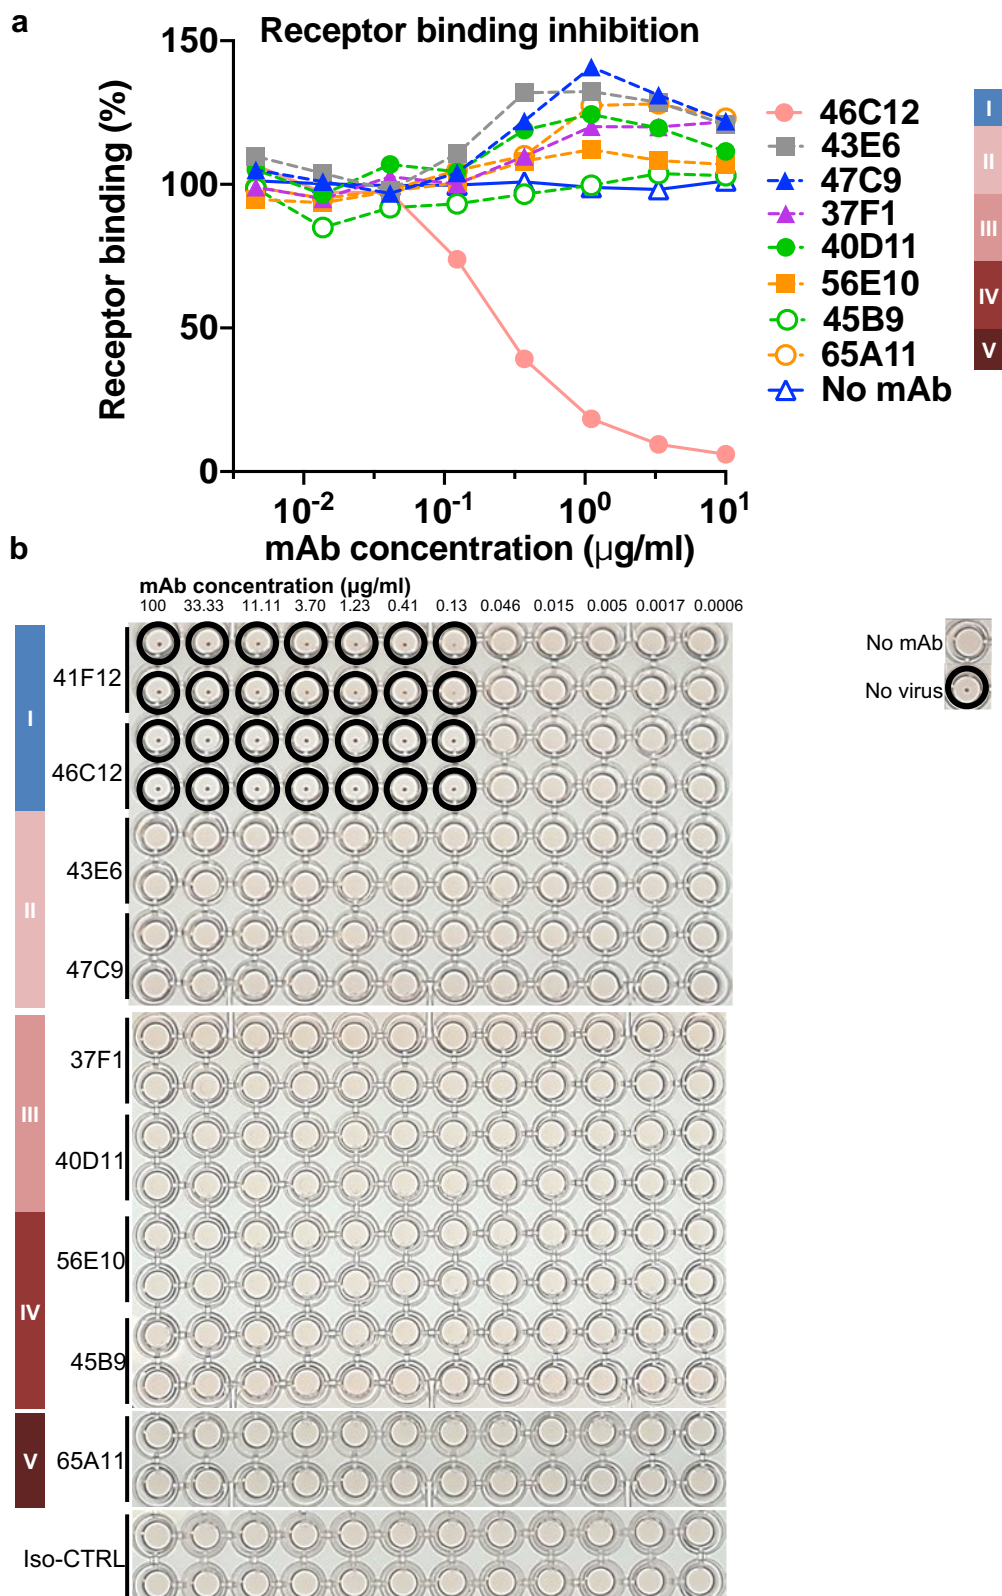

**Supplementary Fig. 10 Interference of monoclonal antibodies with sialoglycan-receptor binding.** **a**, Solid-phase Spike-sialoglycan binding inhibition assay: OC43  $S_{\text{ecto}}$  pre-incubated with serially diluted OC43 S1-directed mAbs from five antibody competition groups (I-V) was added to ELISA plates coated with bovine submaxillary mucin (BSM) highly enriched in sialoglycan receptors. Binding of OC43  $S_{\text{ecto}}$  to BSM was detected using an HRP-conjugated antibody recognizing the C-terminal Strep-tag on OC43  $S_{\text{ecto}}$ . Symbols represent mean values from one representative experiment ( $n=1-4$ ). **b**, Hemagglutination inhibition assay using the OC43 virus to study Interference of monoclonal antibodies with sialoglycan-receptor binding. For the assay, 4 hemagglutinating units of OC43 (strain USA/1967) were mixed with 3-fold serial dilutions of each of the S1A-directed (group I) or S1B-directed (group II-V) monoclonal antibodies in duplicate (starting at 100  $\mu\text{g/ml}$ ), or with an isotype control monoclonal antibody (Iso-CTRL). Formation of immune complexes was allowed for 1 h at room temperature prior to incubation with rat erythrocytes at 4°C in V-shaped 96-well plates. Conditions of erythrocytes incubated without virus (no virus) or monoclonal antibody (no mAb) are shown on the right. Wells showing hemagglutination inhibition are encircled. Two independent experiments were performed, with technical duplicates for each mAb. One representative experiment is shown.

## Supplementary Fig. 11

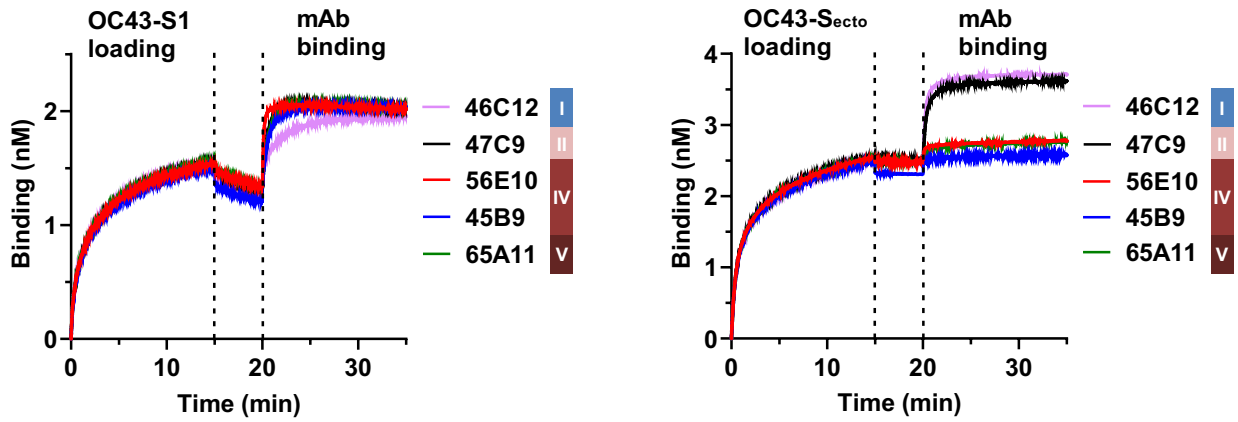

**Supplementary Fig. 11 mAb binding to OC43 spike antigens analysed by biolayer interferometry.** The OC43-S1 or S<sub>ecto</sub> was immobilized on the sensor, after a brief washing step, the biosensor tips were immersed into a well containing monoclonal antibody at a concentration of 50  $\mu\text{g/ml}$  for 15 min. 56E10 and 45B9 (both group IV) and 65A11 (group V) mAbs could bind to monomeric OC43 S1, however, no binding to prefusion OC43-S<sub>ecto</sub> was observed. mAbs 46C12 (group I) and 47C9 (group II) were included as controls. Data from one representative experiment out of two is shown.

## Supplementary Fig. 12

**a**

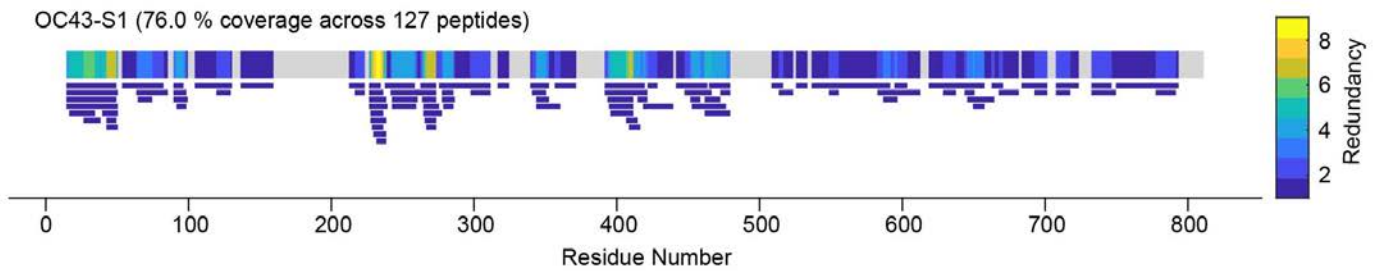

**b**

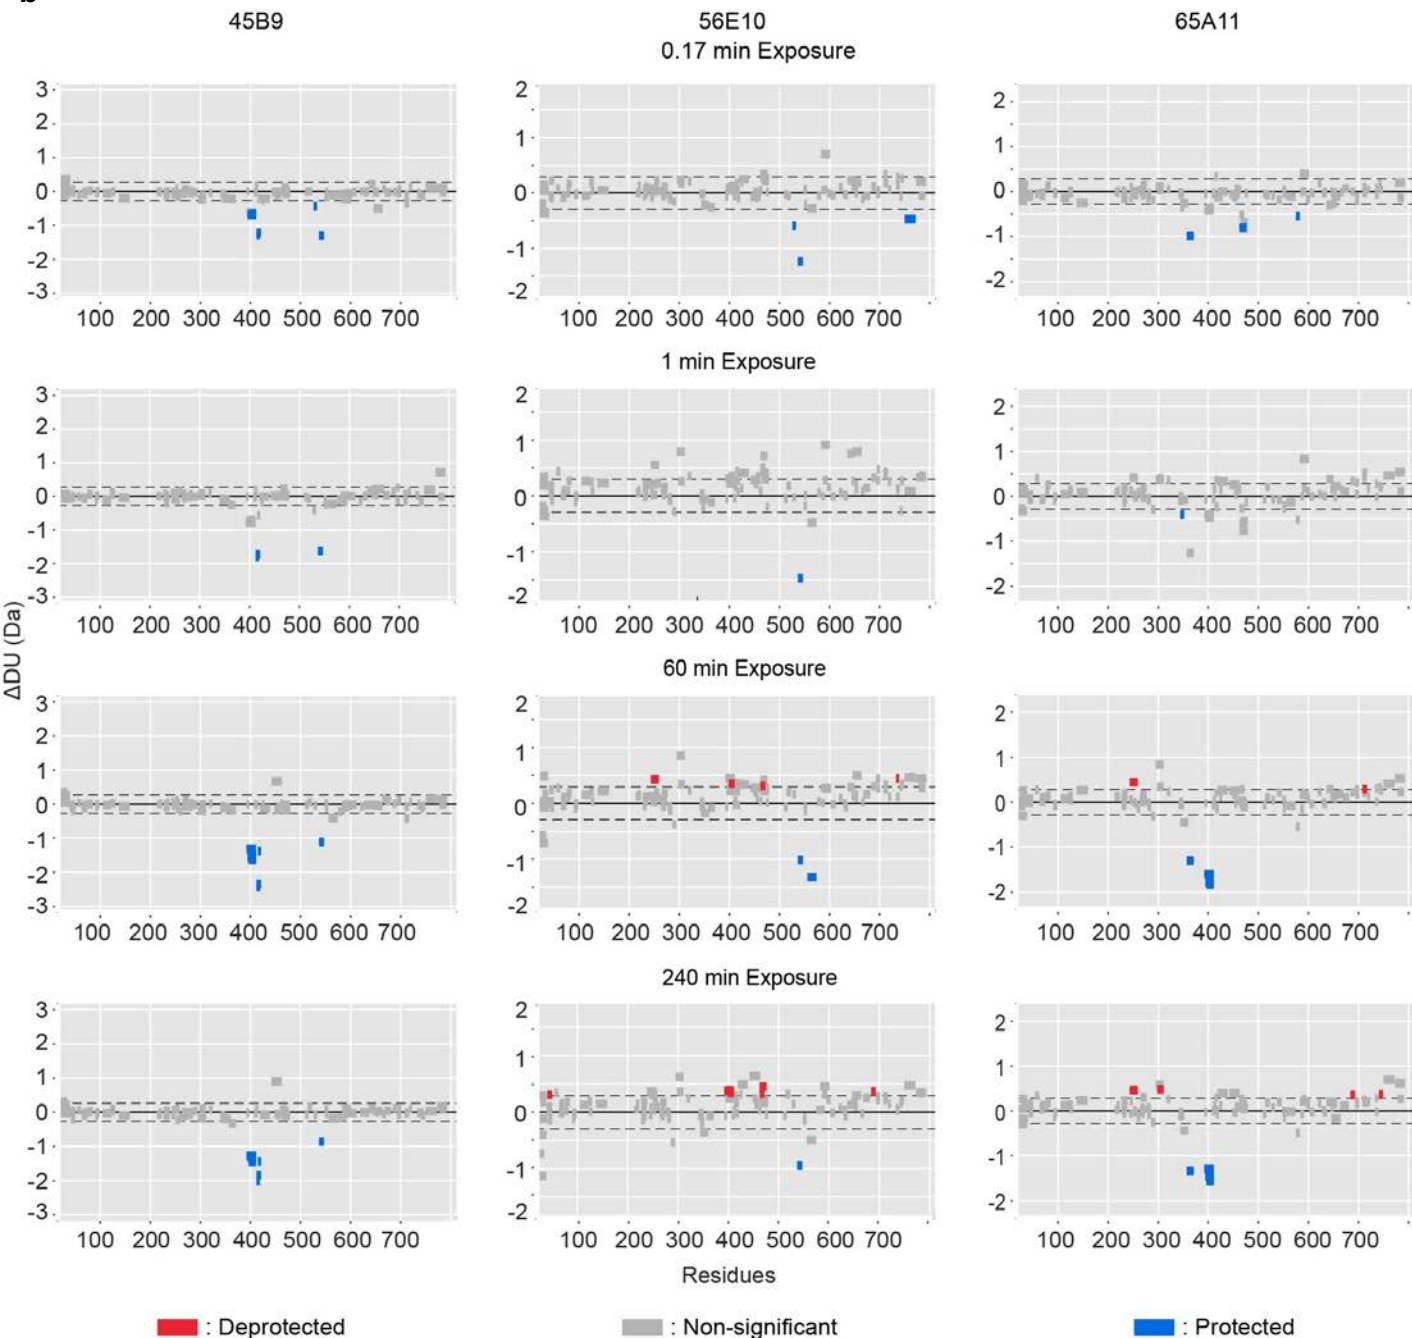

**Supplementary Fig. 12 Epitope identification of 56E10, 45B9 and 65A11 Fabs by HDX-MS. a**, Coverage map of OC43-S1 sequence depicting accepted peptic peptides and redundancy of these peptides. **b**, Statistical testing for the identification of significant changes in deuterium uptake between the unbound OC43-S1 and Fab-OC43-S1 complex. Hybrid significance test was used for the analysis (Deuterios 2.0). Deuterium uptake difference was evaluated between the two states for each peptide against individual replicate variance and an estimate of measurement error and then tested with two-tailed Welch's t-test to confirm the significance based on individual standard deviations. Significant peptides at different time points are shown in red as deprotected and in blue as protected, 99%, CI: 0.27 Da, p-value < 0.01.



# Supplementary Fig. 13

## a 45B9

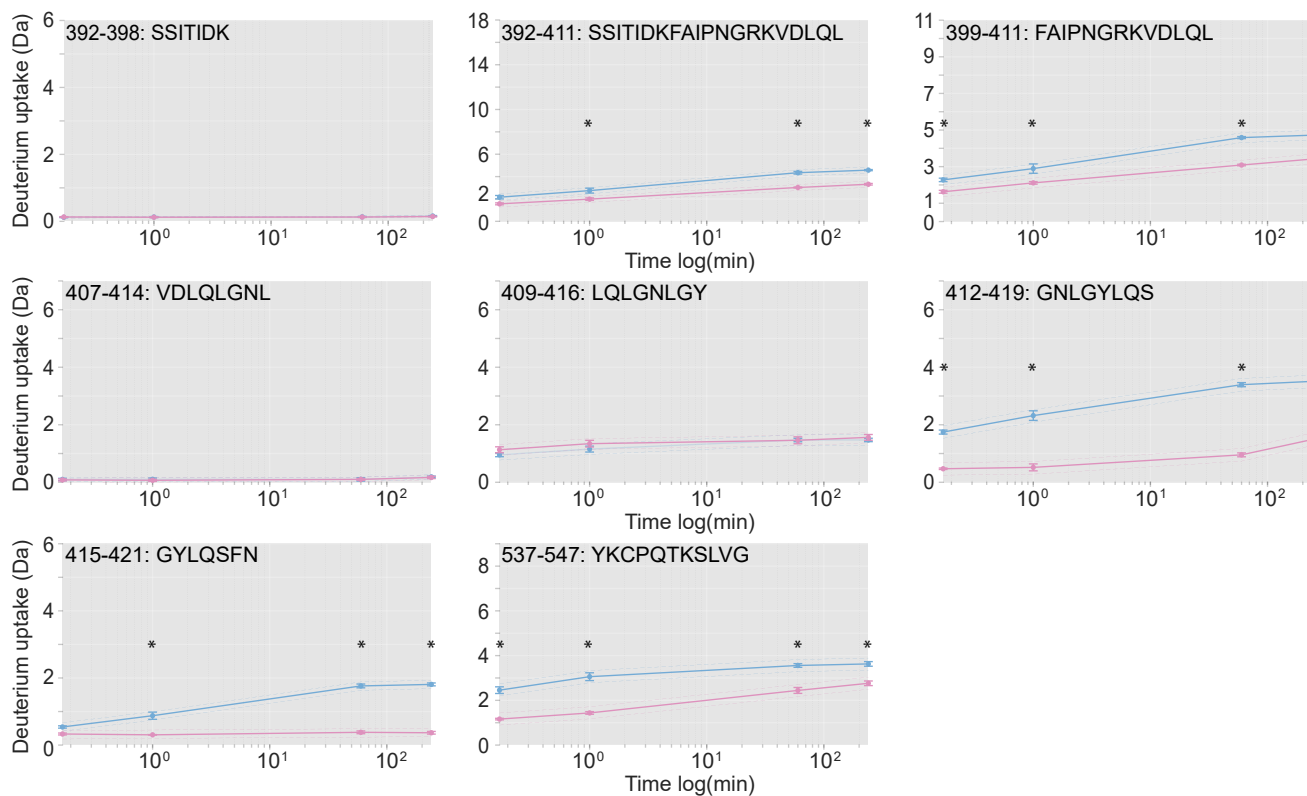

## b 56E10

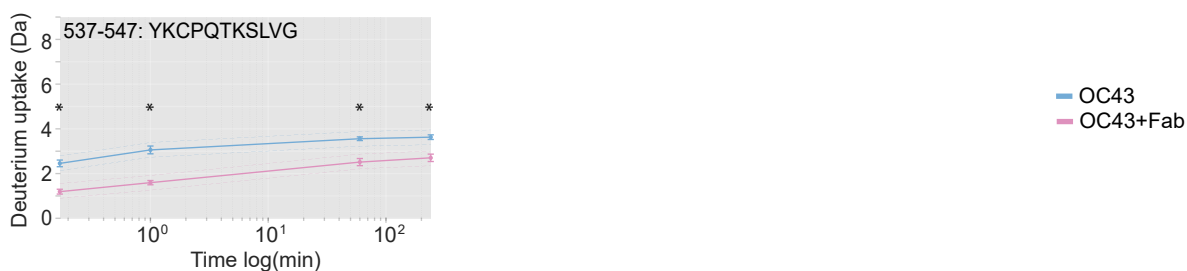

## c 65A11

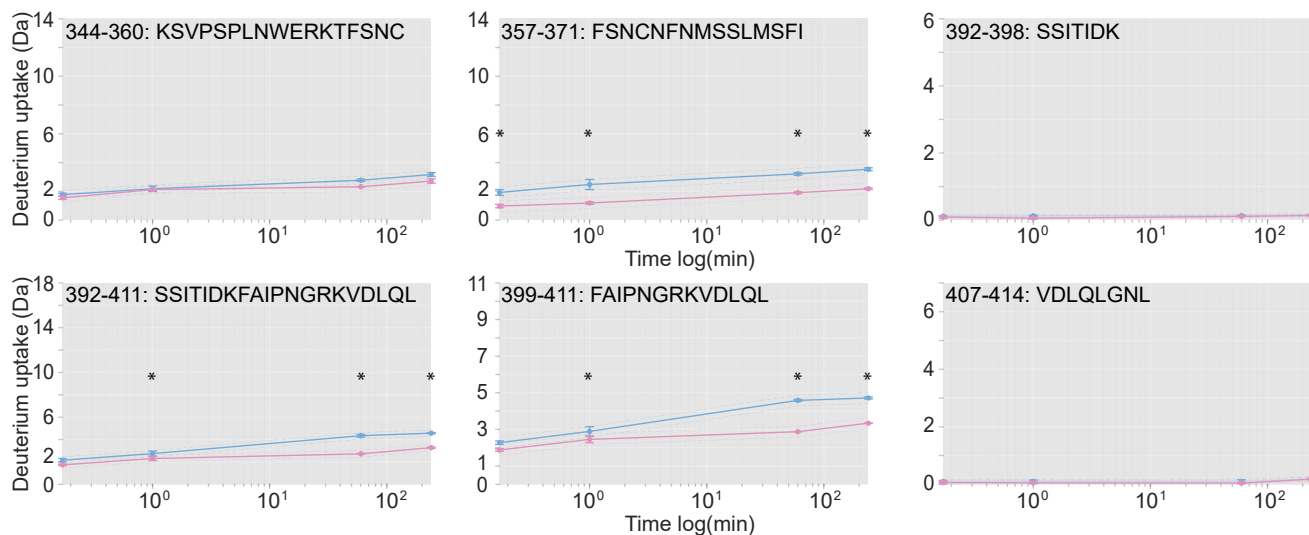

**Supplementary Fig. 13 Deuterium uptake plots for the individual peptic peptides employed in epitope mapping of 45B9 (a) 56E10 (b) and 65A11 (c) Fabs by HDX-MS.** The HDX-MS measurements were performed on three individual experiments across four time points. Peptide-level significance testing (multiple linear regression,  $\alpha=0.001$ ,  $n=3$ ) (Deuterios 2.0) was used for the determination of significant deuterium uptake across the time points for individual peptides between the unbound OC43-S1 (blue) and Fab-OC43-S1 complex (pink). The data is shown as intensity-weighted mean values of deuterium uptake  $\pm$  SD for each time point. The significant deuterium uptake per time point is marked with asterisk ( $p$ -value  $< 0.001$ ).

## Supplementary Fig. 14

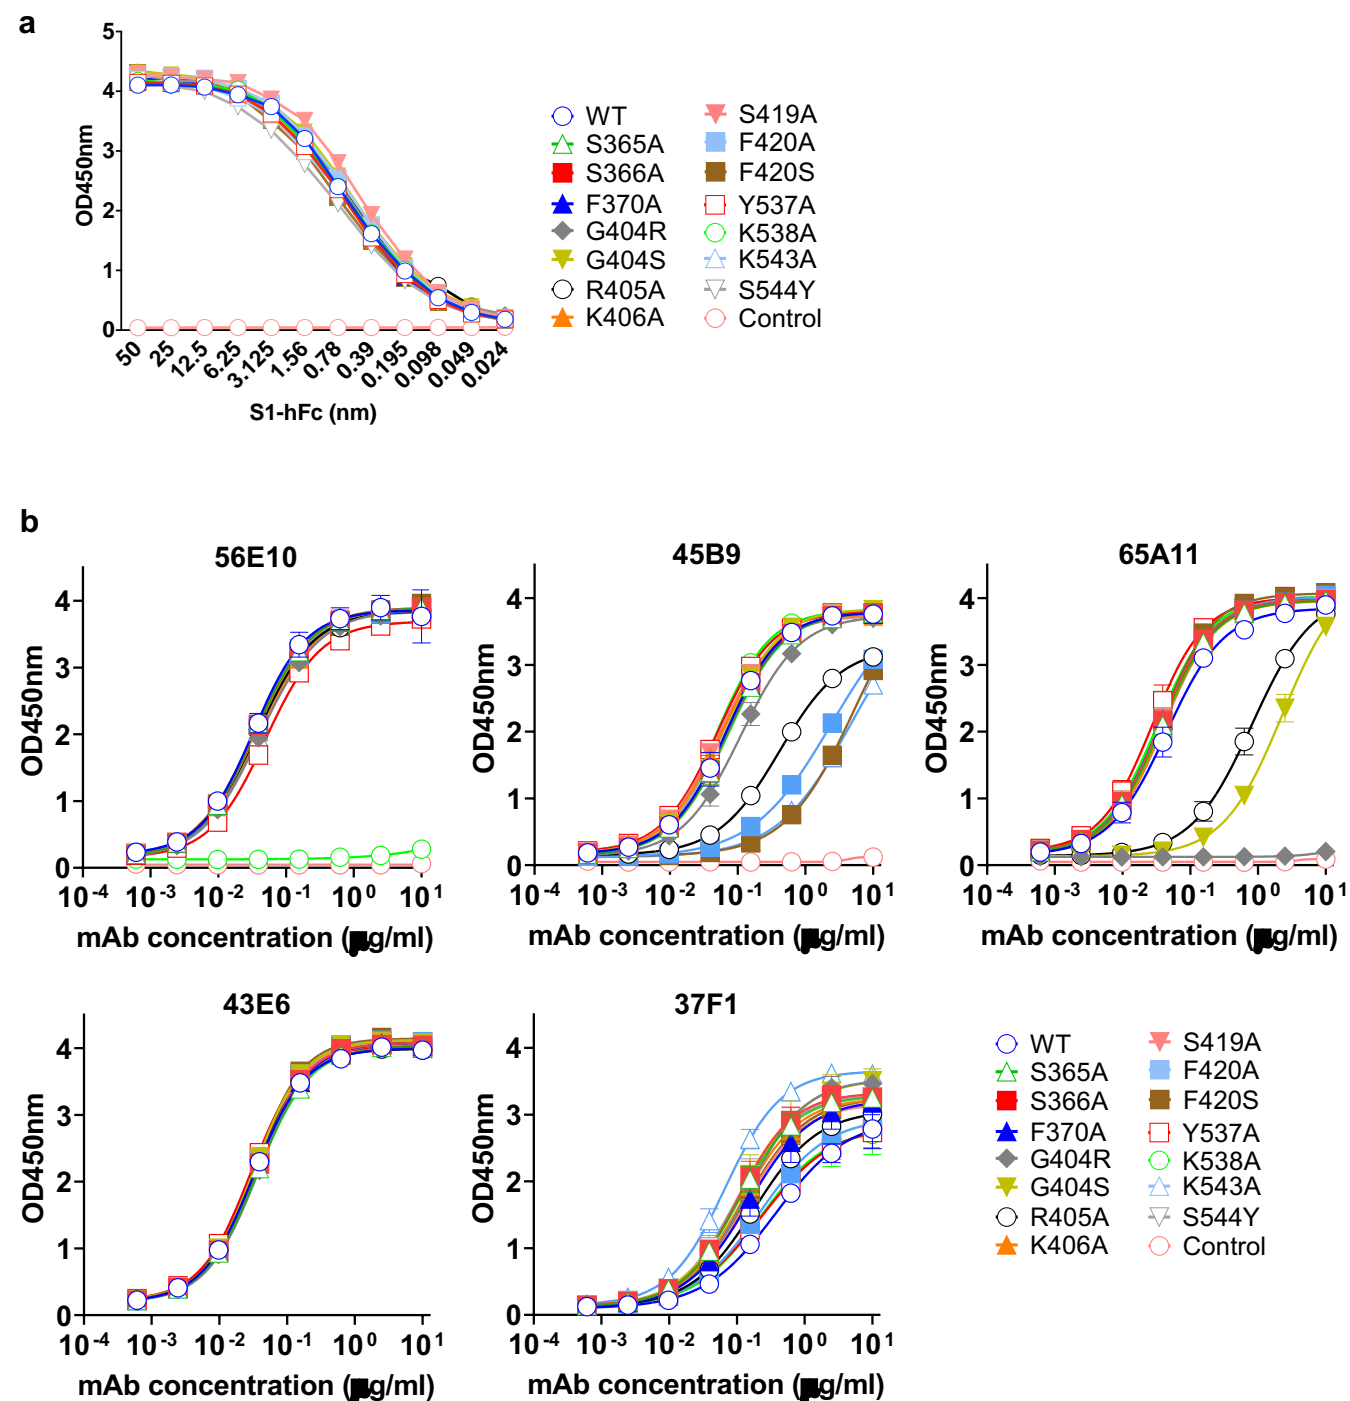

**Supplementary Fig. 14 Impact of individual residue substitutions in HDX-MS identified epitope regions on mAb binding.** **a**, OC43 S1 antigens containing individual residue substitutions were expressed from HEK 293T cells and affinity-purified using the C-terminally fused human Fc tag and ELISA plate coating with equimolar amount of S1 antigens was validated using an anti-human Fc antibody. A representative experiment ( $n=2$ ) is shown. Symbols represent means of duplicates. **b**, ELISA-binding curves of mAbs 56E10, 45B9 and 65A11, and two S1<sub>B</sub> control mAbs 43E6 and 37F1 to OC43 S1 antigens containing individual single site mutations. Symbols represent mean values  $\pm$  SD from two independent experiments with two technical replicates.



# Supplementary Fig. 16

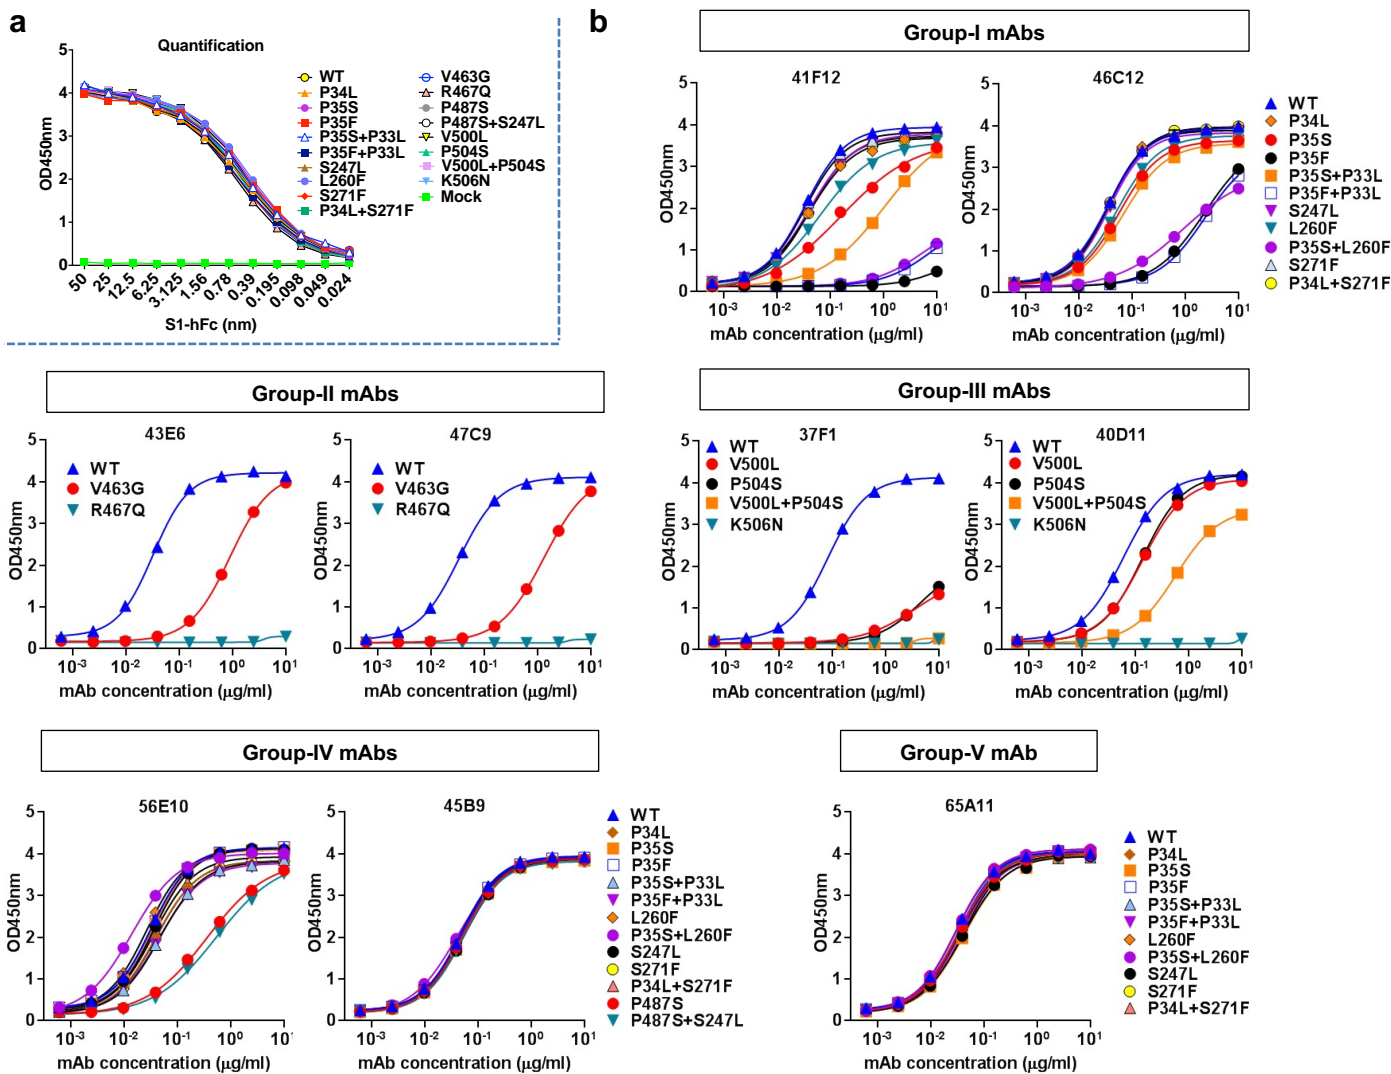

| Group | mAb   | EC <sub>50</sub> (μg/ml) |       |       |       |           |           |       |       |            |       |            |       |       |       |             |       |       |             |       |   |
|-------|-------|--------------------------|-------|-------|-------|-----------|-----------|-------|-------|------------|-------|------------|-------|-------|-------|-------------|-------|-------|-------------|-------|---|
|       |       | WT                       | P34L  | P35S  | P35F  | P35S+P33L | P35F+P33L | S247L | L260F | P35S+L260F | S271F | P34L+S271F | V463G | R467Q | P487S | P487S+S247L | V500L | P504S | V500L+P504S | K506N |   |
| I     | 41F12 | 0.034                    | 0.042 | 0.161 | >10   | 1.048     | 8.049     | 0.041 | 0.064 | 5.74       | 0.034 | 0.042      | -     | -     | -     | -           | -     | -     | -           | -     | - |
|       | 46C12 | 0.035                    | 0.035 | 0.057 | 2.344 | 0.068     | 2.369     | 0.037 | 0.053 | 0.895      | 0.035 | 0.037      | -     | -     | -     | -           | -     | -     | -           | -     | - |
| II    | 43E6  | 0.032                    | -     | -     | -     | -         | -         | -     | -     | -          | -     | -          | 0.900 | >10   | -     | -           | -     | -     | -           | -     | - |
|       | 47C9  | 0.037                    | -     | -     | -     | -         | -         | -     | -     | -          | -     | -          | 1.327 | >10   | -     | -           | -     | -     | -           | -     | - |
| III   | 37F1  | 0.082                    | -     | -     | -     | -         | -         | -     | -     | -          | -     | -          | -     | -     | -     | -           | 3.692 | 4.454 | >10         | >10   | - |
|       | 40D11 | 0.060                    | -     | -     | -     | -         | -         | -     | -     | -          | -     | -          | -     | -     | -     | -           | 0.137 | 0.136 | 0.575       | >10   | - |
| IV    | 56E10 | 0.032                    | 0.039 | 0.034 | 0.033 | 0.047     | 0.045     | 0.037 | 0.027 | 0.014      | 0.040 | 0.036      | -     | -     | 0.362 | 0.540       | -     | -     | -           | -     | - |
|       | 45B9  | 0.048                    | 0.050 | 0.052 | 0.051 | 0.051     | 0.050     | 0.055 | 0.048 | 0.04       | 0.053 | 0.048      | -     | -     | 0.051 | 0.053       | -     | -     | -           | -     | - |
| V     | 65A11 | 0.030                    | 0.034 | 0.043 | 0.034 | 0.034     | 0.036     | 0.036 | 0.033 | 0.03       | 0.041 | 0.034      | -     | -     | -     | -           | -     | -     | -           | -     | - |

**Supplementary Fig. 16 Assessment of selected escape mutations on antibody binding by ELISA. a**, OC43 S1 mutants containing escape mutations were expressed from HEK-293T cells and affinity-purified using the C-terminally fused human Fc tag, and equimolar ELISA plate coating of (mutant) S1 antigens was validated using an anti-human Fc antibody. A representative experiment of two independent experiments (n=2) is shown. Symbols represent means of duplicates. **b**, ELISA-binding curves of mAbs to mutant OC43 S1 antigens containing escape mutations. Average values of a representative experiment with two technical replicates is shown. **c**, Half-maximal effective concentration (EC<sub>50</sub>) titers (μg/ml) were determined, based on **b**. S1<sub>A</sub>-reactive mAbs and mutations within S1<sub>A</sub> domain are colored in blue, and S1<sub>B</sub>-reactive mAbs and mutations within S1<sub>B</sub> domain are colored in red.

# Supplementary Fig. 17

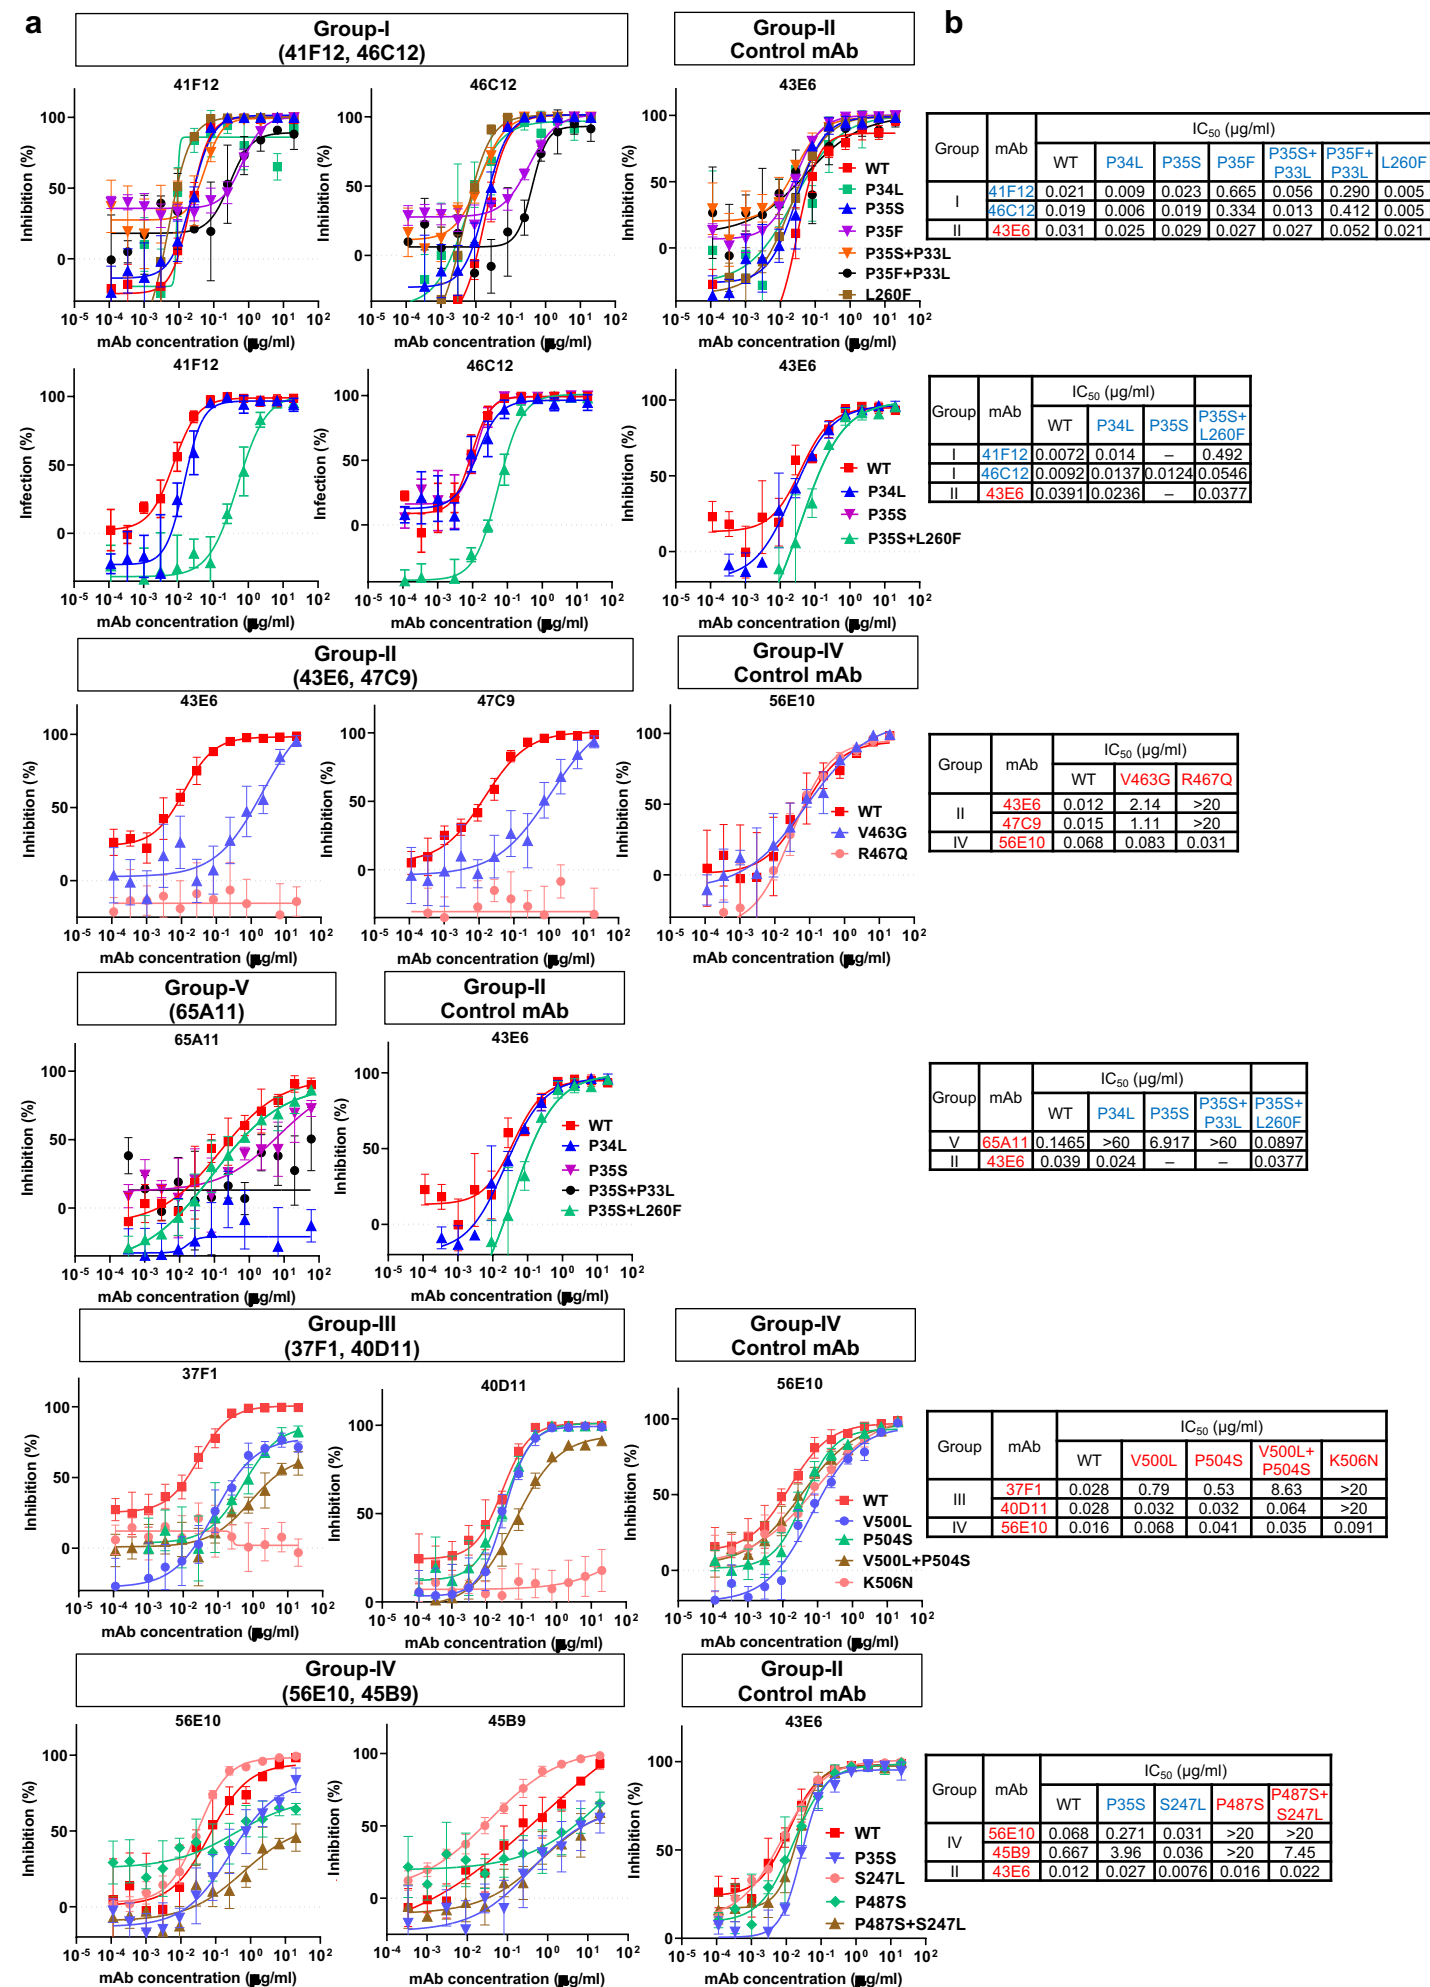

**Supplementary Fig. 17 Assessment of selected escape mutations on antibody neutralization using OC43 S pseudotyped VSV.** **a**, Neutralizing curve of OC43 S mAbs against the viral variants. Single or double amino acid substitutions were introduced to OC43 full-length spike protein to make the pseudotyped virus. Pseudotyped VSV particles pre-incubated with antibodies at indicated concentrations were used to infect HRT-18 cells and luciferase activities in cell lysates were determined at 20 h post transduction to calculate infection inhibition (%) relative to non-antibody-treated control. A representative experiment is shown. Symbols are means  $\pm$  SD of n=3~6 replicates. For testing the effect of viral escape mutations on one group of antibodies, an antibody from a non-competing group was used as control. **b**, Neutralizing abilities of mAbs against the viral variants, shown as half-maximal inhibitory concentrations ( $IC_{50}$ ;  $\mu$ g/ml).  $S1_A$ -reactive mAbs and mutations within  $S1_A$  domain are colored in blue, and  $S1_B$ -reactive mAbs and mutations within  $S1_B$  domain are colored in red likewise.

a

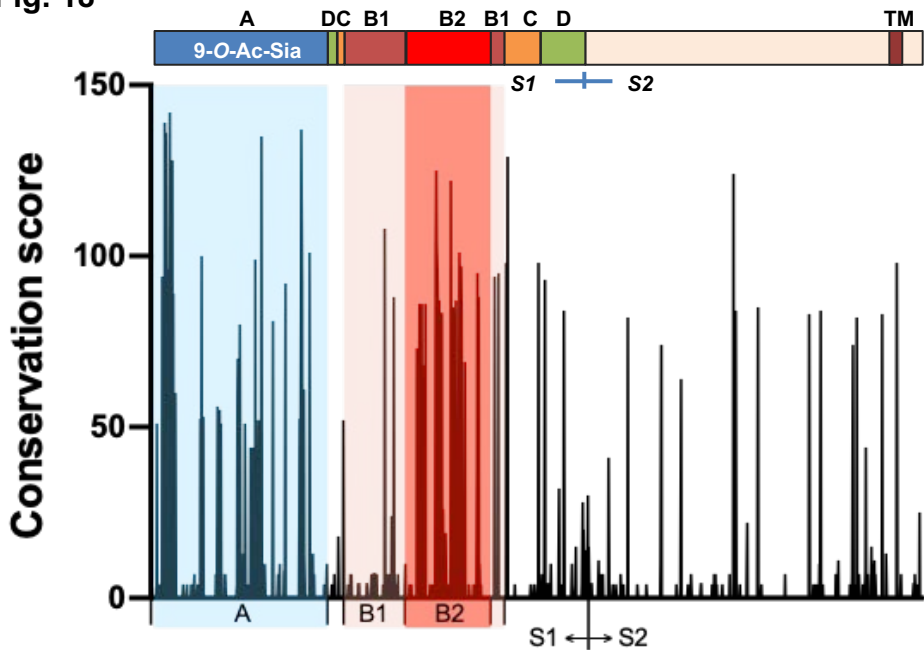

b

| GenBank identifiers OC43 spike protein sequences |            |            |            |            |            |
|--------------------------------------------------|------------|------------|------------|------------|------------|
| AIX10748.1                                       | AGT51620.1 | AIV41903.1 | AIL49506.1 | AIV41819.1 | AQN78736.1 |
| AGT51740.1                                       | AGT51511.1 | AIV41987.1 | AIL49507.1 | AIL49519.1 | AQN78744.1 |
| AGT51412.1                                       | AGT51491.1 | AIL49544.1 | AIL49508.1 | AIV42011.1 | AQN78752.1 |
| AGT51660.1                                       | AGT51730.1 | AIL49500.1 | AIL49510.1 | AIL49505.1 | AQN78760.1 |
| AGT51670.1                                       | AIX10750.1 | AIV41909.1 | AIL49514.1 | AIX10760.1 | AQN78768.1 |
| AGT51680.1                                       | AIX10749.1 | AIL49529.1 | AIL49515.1 | AOL02453.1 | AQN78776.1 |
| AGT51580.1                                       | ATP16757.1 | AIV41915.1 | AIL49545.1 | AMK59677.1 | AIX10763.1 |
| AGT51640.1                                       | AIX10752.1 | AIL49530.1 | AIV41993.1 | AIL49509.1 | ANZ78838.1 |
| AGT51541.1                                       | AIX10751.1 | AIV41921.1 | AIL49546.1 | AIX09799.1 | ANZ78848.1 |
| AGT51471.1                                       | AIX10753.1 | AIL49531.1 | QRK03842.1 | AIX09807.1 | ANZ78849.1 |
| AGT51461.1                                       | AIX10754.1 | AIV41867.1 | AIL49495.1 | AIX10761.1 | ANZ78834.1 |
| AGT51422.1                                       | AEN19358.1 | AIL49532.1 | AIL49547.1 | AIL49491.1 | ANZ78835.1 |
| AGT51690.1                                       | AEN19366.1 | AIV41927.1 | QRK03832.1 | AIV41837.1 | ANZ78839.1 |
| AGT51570.1                                       | AIX10755.1 | AIL49533.1 | AIL49516.1 | AIL49492.1 | ANZ78840.1 |
| AGT51770.1                                       | AIV41891.1 | AIV41933.1 | AIL49517.1 | AIL49520.1 | ANZ78836.1 |
| AGT51720.1                                       | AIL49496.1 | AIL49534.1 | AIL49549.1 | AQN78656.1 | ANZ78837.1 |
| AGT51700.1                                       | QHB49097.1 | AIV41939.1 | AIL49550.1 | AIV41849.1 | ANZ78841.1 |
| AGT51760.1                                       | AIV41795.1 | AIL49535.1 | AIL49551.1 | AIL49493.1 | ANZ78842.1 |
| AGT51481.1                                       | AIL49487.1 | AIV41945.1 | AIX10759.1 | AIV41897.1 | ANZ78843.1 |
| AGT51630.1                                       | QHB49098.1 | AIL49536.1 | AJC98135.1 | AIL49494.1 | ANZ78844.1 |
| AGT51750.1                                       | AIX10756.1 | AIV41951.1 | AIL49484.1 | AQN78664.1 | ANZ78845.1 |
| AGT51600.1                                       | AIV41855.1 | AIL49537.1 | QRK03852.1 | AIX10762.1 | ANZ78846.1 |
| AGT51521.1                                       | AIL49497.1 | AIV41957.1 | AIV41777.1 | AQN78672.1 | ANZ78847.1 |
| AGT51780.1                                       | AIV41861.1 | AIL49538.1 | AIL49485.1 | AIV41873.1 | AVR40342.1 |
| AGT51551.1                                       | AIL49498.1 | AIV41963.1 | AIL49486.1 | AIL49511.1 | AVQ05264.1 |
| AGT51710.1                                       | ATP16767.1 | AIL49539.1 | AIV41783.1 | AIV41879.1 | AWW13566.1 |
| AGT51402.1                                       | AIL49522.1 | AIX10757.1 | AIL49488.1 | AIL49512.1 | AWW13575.1 |
| AGT51650.1                                       | AIL49523.1 | AIV41975.1 | AIV41969.1 | AIV41885.1 | AZP73840.1 |
| AGT51431.1                                       | AIL49524.1 | AIL49540.1 | AIL49501.1 | AIL49513.1 | AVR40344.1 |
| AGT51561.1                                       | AIL49525.1 | AIV41981.1 | AJC98127.1 | AQN78680.1 | QRK03912.1 |
| AGT51790.1                                       | AIL49526.1 | AIL49541.1 | AIL49489.1 | AQN78688.1 | QRK03902.1 |
| AGT51451.1                                       | AIL49527.1 | AIL49542.1 | AIV41831.1 | AQN78696.1 | QRK03862.1 |
| AGT51590.1                                       | AIL49528.1 | AIL49543.1 | AIL49502.1 | AIV41843.1 | QRK03882.1 |
| AGT51441.1                                       | AIL49499.1 | AIX10758.1 | AIV42005.1 | AIL49521.1 | QRK03872.1 |
| AGT51800.1                                       | AIV41801.1 | AIV41999.1 | AIL49503.1 | AQN78704.1 | QRK03922.1 |
| AGT51531.1                                       | AIV41807.1 | AIL49548.1 | AIL49518.1 | AQN78712.1 | QRK03892.1 |
| AGT51610.1                                       | AIV41813.1 | AIL49552.1 | AIV41789.1 | AQN78720.1 | QRK03812.1 |
| AGT51501.1                                       | AIV41825.1 | AIL49504.1 | AIL49490.1 | AQN78728.1 | QRK03822.1 |

**Supplementary Fig. 18 Sequence conservation of the OC43 S protein.** **a**, S protein sequences derived from 228 different OC43 isolates were retrieved from the NIAID Virus Pathogen Database and Analysis Resource (ViPR). An S protein consensus sequence was generated by majority rule using the MUSCLE multiple sequence alignment tool and polymorphism scores at each residue position are calculated using the ViPR algorithm (<https://www.viprbrc.org/>) and displayed with the overall topology of the OC43 S protein (as shown in Fig. 1a) as a reference. **b**, OC43 spike protein sequences used to calculate conservation scores.





**Supplementary Fig. 19 Sequence conservation in OC43 S1 domain.** Protein sequence alignment of domain S1<sub>A</sub> (**a**) and S1<sub>B</sub> (**b**) of S proteins of OC43 strains, using Unipro UGENE ClustalW software. GenBank identifiers of selected S proteins: KF530065.1 (USA/1990(B)), AAT84354.1 (USA/1967), MF314143.1 (USA/2016), OK245433 (NL/2004), KF530088 (USA/1990(A-II)), AY9034551 (BE/2004) and OK245434 (NL/2019). Amino acids that are deviant from the consensus sequence are indicated. Key residues involved in interaction with mAbs identified by escape mutant analysis and mutagenesis are marked with arrow heads and asterisks, respectively. Secondary structural elements (strands and helices) of the HCoV-OC43 prefusion spike (PDB: 6OHW) structure are visualized using ESPript 3.0 (<http://esprict.ibcp.fr/ESPript/ESPript/>). The more variable B2 subdomain of the S1 domain B is outlined by the transparent red box overlay. Sialic acid contacting residues are indicated by star. Loops L1-L3 that constitute the sialic acid binding region are indicated by blue boxes. Residues under positive selection according to Jo et al.<sup>30</sup> are indicated by red dots. Residues under positive selection according to Ren et al.<sup>31</sup> are indicated by purple dots. The four insertions and deletions (Indel-1 to -4) in S1 domains A and B are bordered by dashed rectangles. Three variable loops (K494-G505 loop, D523-L525 loop and P528-T536 loop) in the B2 containing the 37F1 neutralizing epitope are highlighted by green bars, a loop containing region (D461-D476) in B2 that composes a central part of the 47C9 neutralizing epitope is underlined with an orange bar. **c**, Zoomed-in view of the OC43 S1 domain A bound to 9-O-acetylated sialic acid (PDB: 6NZK). L1-L3 loops that compose the sialic acid binding site are marked, as well as the P1 and P2 pockets of the receptor binding site. **d and e**, Spike protein conservation in the S1<sub>B2</sub> subdomain containing the neutralizing epitopes of S1<sub>B</sub>-directed antibodies. **d**, Zoomed-in view of the tip of the B2 subdomain that comprises the 37F1 epitope, with the three variable and partially unstructured loops encircled. **e**, Zoomed-in view of the B2 subdomain with the loop region (D461-D476) that composes a central part of the 47C9 neutralizing epitope encircled. The encircled loops are shown in colors that correspond to the colored bars in the sequence alignment in **b**. Residues in panels c-e are colored based on their conservation across 228 OC43 S sequences, with the purple to green color gradient represent highly conserved to variable residues.

Supplementary Fig. 20

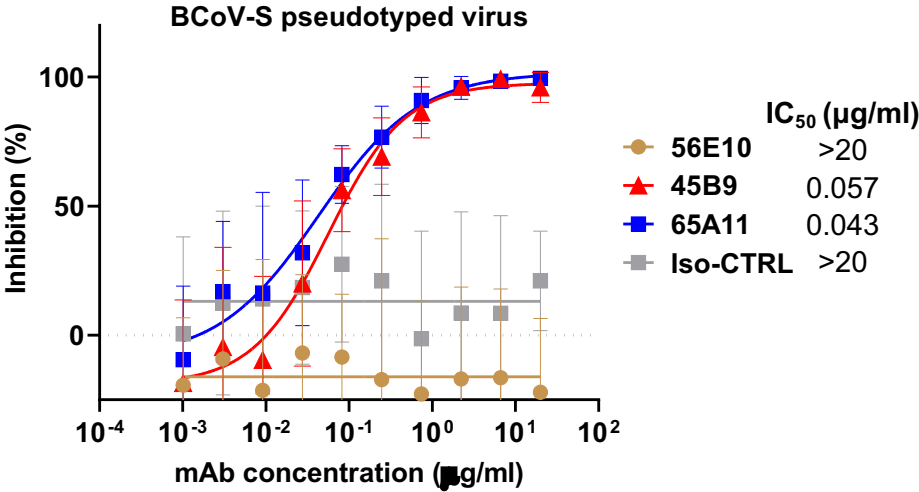

**Supplementary Fig. 20 Cross-neutralization with BCoV S pseudovirus.** The neutralization capacity of broadly-reactive mAbs 45B9 and 65A11 against BCoV was tested using luciferase-encoding VSV particles pseudotyped with spike protein of BCoV (strain Mebus). Symbols represent mean values  $\pm$  SD from two independent experiments with six technical replicates are shown. mAb 56E10 and an isotype control antibody (Iso-CTRL, an anti-Strep-tag human monoclonal antibody) were used as controls. The IC<sub>50</sub> values are shown.

**Supplementary Fig. 21**

OC43-S + 46C12 Fab

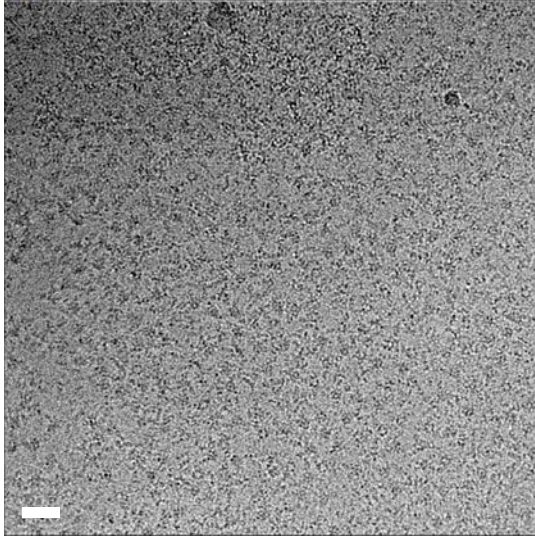

OC43-S + 43E6 Fab

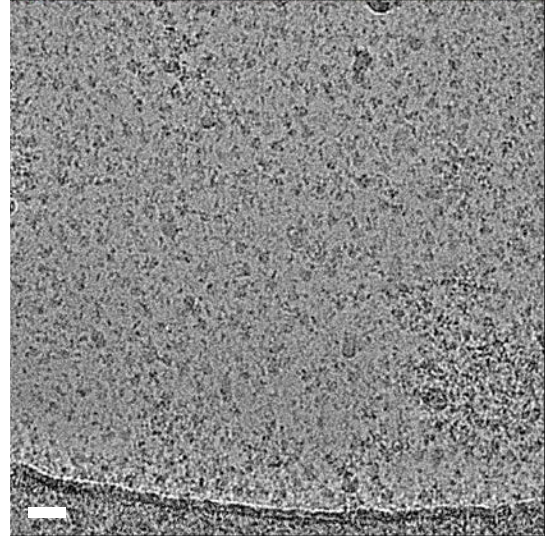

OC43-S + 47C9 Fab

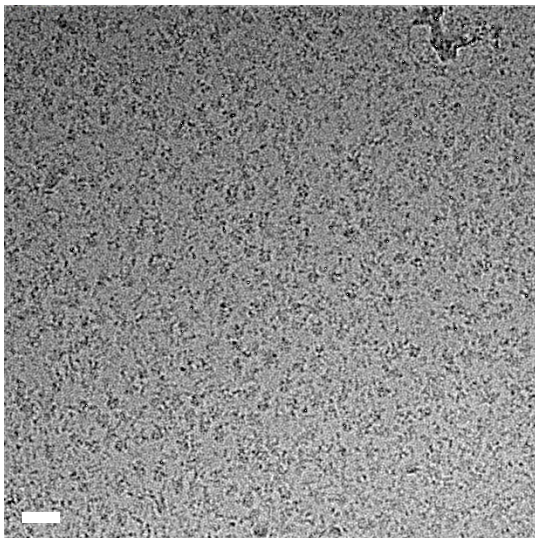

OC43-S + 37F1 Fab

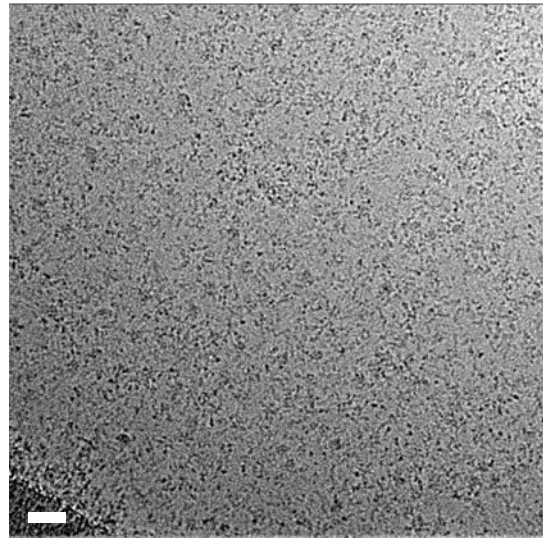

**Supplementary Fig. 21 Representative micrographs for OC43 S trimers incubated with the Fab fragments of 46C12, 43E6, 47C9 and 37F1. Scale bar = 30 nm**
